# Supplementary material for: First reusable ligand-free palladium catalyzed C–P bond formation of aryl halides with trialkylphosphites in neat water
Source: Royal Society of Chemistry journal article supplement (doi:10.1039/c4ra07680j), 2014-10-07
Supplement: c4ra07680j1.pdf [file c4ra07680j1.pdf]

# First Reusable Ligand-Free Palladium Catalyzed C-P Bond Formation of Aryl Halides With Trialkylphosphites in Neat Water

Nasser Iranpoor\*, Habib Firouzabadi\*, Khashayar Rajabi Moghadam and Somayeh Motavalli

[Iranpoor@susc.ac.ir](mailto:Iranpoor@susc.ac.ir), [Firouzabadi@susc.ac.ir](mailto:Firouzabadi@susc.ac.ir)

## Supporting Information

| Contents                                                                                                            | Page |
|---------------------------------------------------------------------------------------------------------------------|------|
| 1. General considerations .....                                                                                     | 3    |
| 1.1 Reagents .....                                                                                                  | 3    |
| 1.2 Analytical methods .....                                                                                        | 3    |
| 2 Palladium-catalyzed coupling of aryl halides with P(OEt) <sub>3</sub> and P(OPr <sup>i</sup> ) <sub>3</sub> ..... | 3    |
| 2.1 Characterization of the products .....                                                                          | 4    |
| 2.2 Synthesis of Diethyl-phenyl-phosphonate in large scale .....                                                    | 8    |
| 2.3 Copies of <sup>1</sup> H, <sup>13</sup> C, and <sup>31</sup> P NMR spectra .....                                | 9    |
| 3 References .....                                                                                                  | 37   |

## 1. General considerations:

### 1.1 Reagents:

All the palladium catalysts have purity greater than 97% and arylhalides were reagent grade. All reagents and solvents were obtained from commercial suppliers and used without further purification.

### 1.2 Analytical methods:

$^1\text{H}$  and  $^{13}\text{C}$  spectra were recorded on a Bruker Avance DPX-250 spectrometer and  $^{31}\text{P}$  NMR (on a Bruker UltraShield-400 spectrometer) using tetramethylsilane (TMS) as internal standard in pure deuterated solvents. The reaction monitoring was carried out on silica gel analytical sheets or by GC analysis using a 1m length column packed with DC-200 stationary phase. Column chromatography was carried out on column of silica gel.

## 2 Palladium-catalyzed coupling of aryl halides with $\text{P}(\text{OEt})_3$ and $\text{P}(\text{OPr}^i)_3$ :

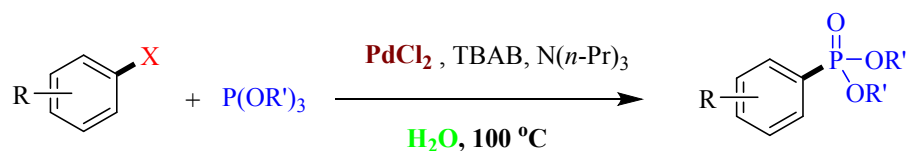

R: H,  $\text{NO}_2$ , CN,  $\text{OCH}_3$ ,  $\text{CH}_3$ ,  $\text{CF}_3$ , Br, Cl, OH,  $\text{NH}_2$ , Ph

R': Et, *i*-Pr, Ph

X: Cl, Br, I

### 2.1 General Procedure for phosphonation of aryl halides with trialkylphosphites using $\text{PdCl}_2$ as catalyst in neat water:

A mixture of  $\text{PdCl}_2$  (0.004 g, 0.022 mmol, 4.4 mol%), aryl halide (0.5 mmol), trialkylphosphite (2.0 mmol),  $n\text{-Pr}_3\text{N}$  (1.0 mmol, 0.18 mL), TBAB (0.5 mmol, 0.166 g), in water (1.5 mL) was heated at 100 °C. After completion of the reaction monitored by GC or TLC analysis, the reaction mixture was cooled to room temperature. The organic compounds were extracted with ethyl acetate ( $3 \times 10$  mL) from the aqueous layer and dried over anhydrous  $\text{Na}_2\text{SO}_4$ , filtered, and concentrated in vacuum. The crude organic mixture was then purified by silica gel column chromatography using petroleum ether/ethyl acetate 4:1 as eluent to obtain the desired product (Table 1).

## 2.1 Characterization of the products:

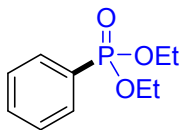

**Diethyl-phenyl-phosphonate<sup>1,2,3,6</sup>: (3a)** [CAS No. 1754-49-0] oil, yield: 99%; <sup>1</sup>H NMR (250 MHz, CDCl<sub>3</sub>/TMS): δ (ppm) = 1.22 (t, J = 7.0 Hz, 6H), 3.99-4.10 (m, 2H), 7.38-7.48 (m, 2H), 7.70-7.78 (m, 2H); <sup>13</sup>C NMR (CDCl<sub>3</sub>, 62.5 MHz) δ 132.35, 131.69, 128.58, 128.34, 62.16, 16.37; <sup>31</sup>P NMR (CDCl<sub>3</sub>, 162 MHz) : δ(ppm) 18.35 ; HRMS: *m/z* 241.1

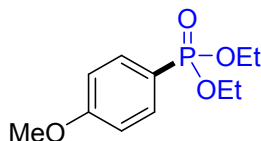

**diethyl (4-methoxyphenyl)phosphonate<sup>1,2,6</sup>: (3b)** [CAS No. 3762-33-2] oil yield 90% <sup>1</sup>H NMR (250 MHz, CDCl<sub>3</sub>/TMS): δ (ppm) = 1.18-1.23 (t, J = 7.1 Hz, 6H), 3.7-4.06 (m, 4H), 6.83-6.89 (m 2H), 7.59-7.68(m, 2H); <sup>13</sup>C NMR (CDCl<sub>3</sub>, 62.5 MHz) δ 159.5, 129.4, 120.6, 113.8, 58.0, 55.0, 16.8; <sup>31</sup>P NMR(CDCl<sub>3</sub>, 162 MHz) δ 18.4; HRMS: *m/z* 244.1

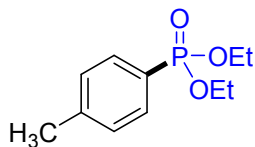

**diethyl p-tolylphosphonate<sup>1,2,3,6</sup> (3c)** [CAS No. 3762-25-2] oil yield 83% <sup>1</sup>H NMR (250 MHz, CDCl<sub>3</sub>/TMS): δ (ppm) = 1.18 (t, J = 6.9 Hz, 6H), 2.27(s), 3.93-4.01 (m, 4H), 7.12-7.16(m, 2H), 7.53-7.61(m, 2H); <sup>13</sup>C NMR (CDCl<sub>3</sub>, 62.5 MHz) δ 143.4, 137.4, 133.0, 127.4, 64.0, 21.8, 16.4; <sup>31</sup>P NMR(CDCl<sub>3</sub>, 162 MHz) δ 18.8 HRMS: *m/z* 228.1

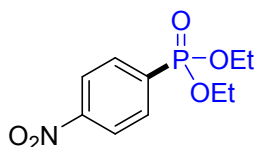

**diethyl (4-nitrophenyl)phosphonate<sup>1</sup> (3d)** [CAS No. 3762-25-2, 1754-42-3] oil yield 85% <sup>1</sup>H NMR (250 MHz, CDCl<sub>3</sub>/TMS): δ (ppm) = 1.22 (t, J = 7.1 Hz, 3H), 3.77-3.89 (m, 4H), 7.50-7.54 (m, 2H), 8.16-8.20 (m, 2H); <sup>13</sup>C NMR (CDCl<sub>3</sub>, 62.5 MHz) δ 149.60, 134.55, 129.26, 123.38, 57.81-58.00 (d, J = 2.2 Hz), 16.88-16.80 (d, J = 0.8 Hz); <sup>31</sup>P NMR(CDCl<sub>3</sub>, 162 MHz) δ 14.91; HRMS: *m/z* 259.1

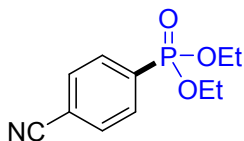

**diethyl (4-cyanophenyl)phosphonate<sup>1,6</sup> (3e)** [CAS No. 28255-72-3] oil yield 65% <sup>1</sup>H NMR (250 MHz, CDCl<sub>3</sub>/TMS): δ (ppm) = 1.19-1.25 (t, J = 7.0 Hz, 6H), 3.80-3.86 (m,

4H), 7.40–7.46 (m, 2H), 7.54–7.63 (m, 2H);  $^{13}\text{C}$  NMR ( $\text{CDCl}_3$ , 62.5 MHz)  $\delta$  140.1, 135.4, 131.2, 118.2, 114.5, 66.5, 16.5;  $^{31}\text{P}$  NMR( $\text{CDCl}_3$ , 162 MHz)  $\delta$  18.5; HRMS:  $m/z$  239.1

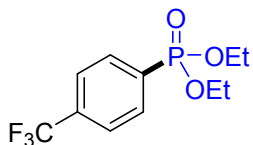

**diethyl (4-(trifluoromethyl)phenyl)phosphonate<sup>6</sup> (3f)** [CAS No. 99578-68-4] oil yield 83%  $^1\text{H}$  NMR (250 MHz,  $\text{CDCl}_3/\text{TMS}$ ):  $\delta$  (ppm) = 1.24 (t,  $J$  = 6.9 Hz, 6H), 3.96–4.09 (m, 4H), 7.63–7.65 (m, 2H), 7.81–7.79 (m, 2H);  $^{13}\text{C}$  NMR ( $\text{CDCl}_3$ , 62.5 MHz)  $\delta$  137.2, 135.6, 132.2, 125.0, 124.1, 59.1, 16.8;  $^{31}\text{P}$  NMR( $\text{CDCl}_3$ , 162 MHz)  $\delta$  18.8, HRMS:  $m/z$  282.1

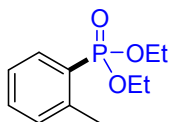

**diethyl o-tolylphosphonate<sup>6</sup> (3g)** [CAS No. 62778-16-9] oil yield 67%  $^1\text{H}$  NMR (250 MHz,  $\text{CDCl}_3/\text{TMS}$ ):  $\delta$  (ppm) = 1.19 (t,  $J$  = 6.75 Hz, 6H), 2.45 (s), 3.96–4.02 (m, 4H), 7.11–7.31 (m, 2H), 7.77–7.85 (m, 2H);  $^{13}\text{C}$  NMR ( $\text{CDCl}_3$ , 62.5 MHz)  $\delta$  141.7, 133.9, 132.4, 131.2, 131.0, 125.4, 61.9, 19.7, 16.2;  $^{31}\text{P}$  NMR( $\text{CDCl}_3$ , 162 MHz)  $\delta$  18.0; HRMS:  $m/z$  228.1

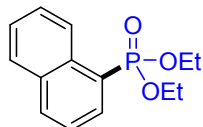

**diethyl naphthalen-1-ylphosphonate<sup>1,2,6</sup> (3h)** [CAS No. 25944-75-6] oil yield 99%  $^1\text{H}$  NMR (250 MHz,  $\text{CDCl}_3/\text{TMS}$ ):  $\delta$  (ppm) = 1.13 (t,  $J$  = 6.8 Hz, 6H), 3.78–3.88 (m, 4H), 7.11–7.31 (m, 2H), 7.02–8.23 (m, 9H);  $^{13}\text{C}$  NMR ( $\text{CDCl}_3$ , 62.5 MHz)  $\delta$  133.7, 131.4, 127.3, 126.3, 59.1, 16.7;  $^{31}\text{P}$  NMR( $\text{CDCl}_3$ , 162 MHz)  $\delta$  19.1; HRMS:  $m/z$  264.1

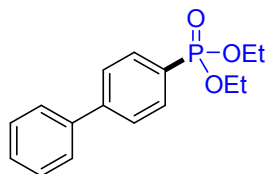

**diethyl [1,1'-biphenyl]-4-ylphosphonate<sup>2,6</sup> (3i)** oil yield 99%  $^1\text{H}$  NMR (250 MHz,  $\text{CDCl}_3/\text{TMS}$ ):  $\delta$  (ppm) = 1.30–1.36 (t,  $J$  = 7.1, 6H), 4.08–4.17 (m, 4H), 7.42–7.91 (m, 9H);  $^{13}\text{C}$  NMR ( $\text{CDCl}_3$ , 62.5 MHz)  $\delta$  145.1, 141.1, 132.3, 128.8, 127.2, 118.2, 111.8, 59.1, 16.2;  $^{31}\text{P}$  NMR( $\text{CDCl}_3$ , 162 MHz)  $\delta$  17.8; HRMS:  $m/z$  290.1

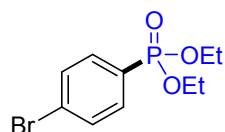

**diethyl (4-bromophenyl)phosphonate (3j)** [CAS No. 20677-12-7] oil yield 99%  $^1\text{H}$  NMR (250 MHz,  $\text{CDCl}_3/\text{TMS}$ ):  $\delta$  (ppm) = 1.19–1.22 (t,  $J$  = 0.06 Hz, 6H), 3.97–4.02 (m, 4H), 7.49–7.59 (m, 4H);  $^{13}\text{C}$  NMR ( $\text{CDCl}_3$ , 62.5 MHz)  $\delta$  137.0, 133.1, 128.8, 126.0, 58.9, 16.8;  $^{31}\text{P}$  NMR( $\text{CDCl}_3$ , 162 MHz)  $\delta$  18.2 HRMS:  $m/z$  292.1

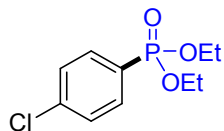

**diethyl (4-chlorophenyl)phosphonate<sup>1,2</sup> (3k)** [CAS No. 39225-17-7] oil yield 99% <sup>1</sup>H NMR (250 MHz, CDCl<sub>3</sub>/TMS): δ (ppm) =1.22(t, 6H), 3.95-4.04 (m, 4H), 7.33-7.38 (m, 2H), 7.61-7.69 (m, 2H); <sup>13</sup>C NMR (CDCl<sub>3</sub>, 62.5 MHz) δ 138.5, 134.5, 129.2, 123.3, 58.0, 16.8; <sup>31</sup>P NMR(CDCl<sub>3</sub>, 162 MHz) δ 18.1; HRMS: *m/z* 248.0

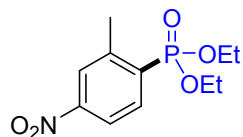

**diethyl (2-methyl-4-nitrophenyl)phosphonate (3l)** oil yield 85% <sup>1</sup>H NMR (250 MHz, CDCl<sub>3</sub>/TMS): δ (ppm) =1.17-1.20 (t, J=7.0, 6H), 2.45(s, 3H), 3.96-4.02 (m, 4H), 7.29-7.32 (m, 1H); 7.77-7.88 (m, 2H); <sup>13</sup>C NMR (CDCl<sub>3</sub>, 62.5 MHz) δ 153.4, 147.8, 135.6, 132.4, 126.6, 120.6, 61.0, 21.5, 16.9; <sup>31</sup>P NMR(CDCl<sub>3</sub>, 162 MHz) δ 17.9; HRMS: *m/z* 273.1

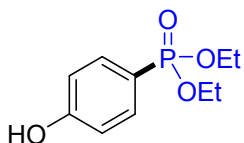

**diethyl (4-hydroxyphenyl)phosphonate<sup>1</sup> (3m)** [CAS No. 28255-39-2] oil yield 90% ; <sup>1</sup>H NMR (250 MHz, CDCl<sub>3</sub>/TMS): δ (ppm) =1.26-1.27 (t, J= 7.0, 6H), 4.01-4.14(m, 4H), 6.92-7.62 (m, 4H); 9.42-9.44(1H); <sup>13</sup>C NMR (CDCl<sub>3</sub>, 62.5 MHz) δ 158.9, 138.6, 128.1, 127.9, 115.5, 68.6, 16.7; <sup>31</sup>P NMR(CDCl<sub>3</sub>, 162 MHz) δ 18.1; HRMS: *m/z* 230.1

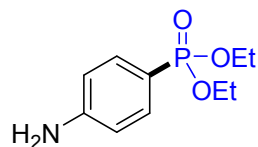

**diethyl (4-aminophenyl)phosphonate (3n)** [CAS No. 42822-57-1] oil yield 90% <sup>1</sup>H NMR (250 MHz, CDCl<sub>3</sub>/TMS): δ (ppm) =1.19-1.24 (t, J=6.9 6H), 3.93-4.08 (m, 4H), 6.64-6.66 (m, 2H); 7.44-7.53 (m, 4H); <sup>13</sup>C NMR (CDCl<sub>3</sub>, 62.5 MHz) δ 150.5, 133.5, 121.1, 114.3, 61.7, 16.8; <sup>31</sup>P NMR(CDCl<sub>3</sub>, 162 MHz) δ 18.2; HRMS: *m/z* 229.1

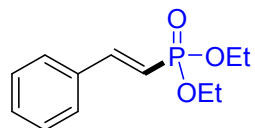

**diethyl (E,Z)-styrylphosphonate<sup>6</sup> (3o)** oil yield 90% <sup>1</sup>H NMR (250 MHz, CDCl<sub>3</sub>/TMS): δ (ppm) =1.26-1.33(t, J= 8.9, 6H), 4.02-4.11 (m, 4H), 6.13-6.28 (m, 2H), 7.25-7.46 (m, 5H); <sup>13</sup>C NMR (CDCl<sub>3</sub>, 62.5 MHz) δ 148.7, 132.7, 130.2, 129.0 128.5, 127.6, 126.2, 112.1, 61.8, 16.2; <sup>31</sup>P NMR(CDCl<sub>3</sub>, 162 MHz) δ 17.4; HRMS: *m/z* 228.1

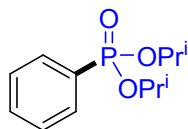

**diisopropyl phenylphosphonate<sup>1,3,4</sup> (3p)** [CAS No. 7237-16-3] oil yield 90% <sup>1</sup>H NMR (250 MHz, CDCl<sub>3</sub>/TMS): δ (ppm) = 1.17-1.34(m, 12H), 4.53-4.71 (m, 2H), 7.39-7.46 (m, 2H), 7.73-7.82 (m, 2H); <sup>13</sup>C NMR (CDCl<sub>3</sub>, 62.5 MHz) δ 133.6, 124.1, 70.2, 24.0; <sup>31</sup>P NMR(CDCl<sub>3</sub>, 162 MHz) δ 16.0; HRMS: *m/z* 242.1

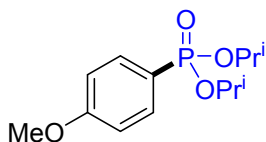

**diisopropyl (4-methoxyphenyl)phosphonate<sup>2</sup> (3q)** oil yield 90% <sup>1</sup>H NMR (250 MHz, CDCl<sub>3</sub>/TMS): δ (ppm) = 1.09-1.26 (m, 12H), 3.72 (s, 3H), 4.50-4.58 (m, 2H), 6.81-6.86 (m, 2H), 7.59-7.68 (m, 2H); <sup>13</sup>C NMR (CDCl<sub>3</sub>, 62.5 MHz) δ 162.5, 133.6, 122.3, 113.8, 70.4, 55.1, 23.7; <sup>31</sup>P NMR(CDCl<sub>3</sub>, 162 MHz) δ 15.9 HRMS: *m/z* 272.1

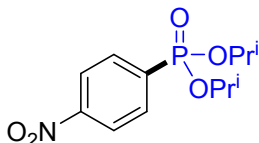

**diisopropyl (4-nitrophenyl)phosphonate<sup>3</sup> (3r)** oil yield 90% <sup>1</sup>H NMR (250 MHz, CDCl<sub>3</sub>/TMS): δ (ppm) = 1.20-1.37(m, 12H), 4.54-4.61 (m, 2H), 7.93-8.23 (m, 4H); <sup>13</sup>C NMR (CDCl<sub>3</sub>, 62.5 MHz) δ 149.3, 139.4, 133.8, 121.2, 70.3, 25.8; <sup>31</sup>P NMR(CDCl<sub>3</sub>, 162 MHz) δ 16.5; HRMS: *m/z* 287.1

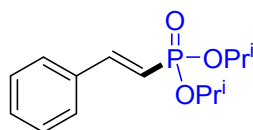

**diisopropyl (E,Z)-styrylphosphonate<sup>4</sup> (3s)** oil yield 90% <sup>1</sup>H NMR (250 MHz, CDCl<sub>3</sub>/TMS): δ (ppm) = 1.22-1.30(m, 12H), 4.60-4.68 (m, 2H), 6.11-6.25 (m, 1H), 7.21-7.44(m, 6H), 7.50(s, 1H); <sup>13</sup>C NMR (CDCl<sub>3</sub>, 62.5 MHz) δ 148.0, 134.7, 130.0, 128.7, 127.6, 116.8, 70.6, 23.0; <sup>31</sup>P NMR(CDCl<sub>3</sub>, 162 MHz) δ 19.5; HRMS: *m/z* 256.1

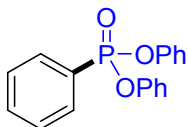

**diphenyl phenylphosphonate (3t)** [CAS No. 3049-24-9] oil yield 90% <sup>1</sup>H NMR (250 MHz, CDCl<sub>3</sub>/TMS): δ (ppm) = 6.88-6.93(m, 2H), 7.18-7.33 (m, 8H), 7.48-7.63 (m, 6H), 7.99-8.08(m, 2H); <sup>13</sup>C NMR (CDCl<sub>3</sub>, 62.5 MHz) δ 150.2, 133.6, 132.3, 129.4, 129.0, 128.7, 125.5, 119.8; <sup>31</sup>P NMR(CDCl<sub>3</sub>, 162 MHz) δ 12.6; HRMS: *m/z* 310.1

## 2.2 Synthesis of Diethyl-phenyl-phosphonate in large scale:

Iodobenzene (0.1 mol, 11.1 mL), PdCl<sub>2</sub> (0.05 g, 0.22 mmol), triethylphosphite (0.4 mol, 67.2 mL), *n*-Pr<sub>3</sub>N (0.2 mol, 37.7 mL) and TBAB (0.1 mol, 32.23 g), in water (150 mL) was heated at 100 °C. After completion, the reaction mixture was cooled to room temperature and extracted with ethyl acetate from the aqueous layer, and dried over anhydrous Na<sub>2</sub>SO<sub>4</sub>, filtered, and concentrated in vacuum. The crude organic mixture was then purified by silica gel column chromatography using petroleum ether/ethyl acetate 4:1 to obtain the desired product. (Yield 78%)

## 2.3 Copies of $^1\text{H}$ , $^{13}\text{C}$ , and $^{31}\text{P}$ NMR spectra

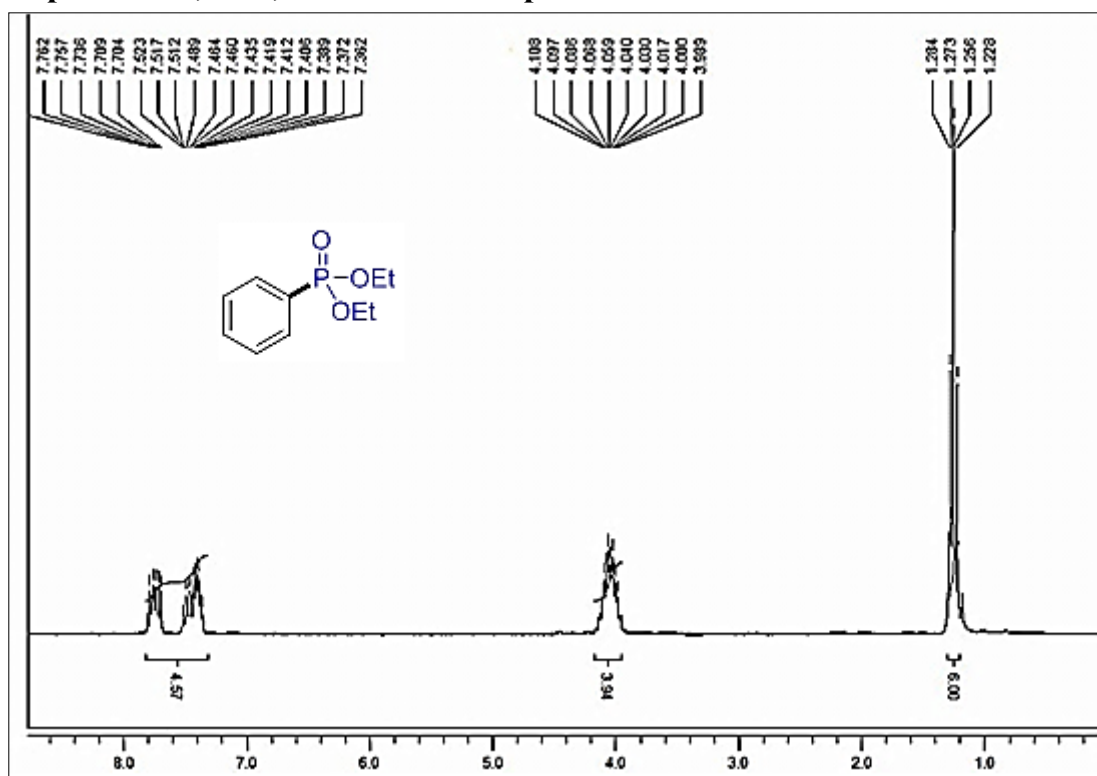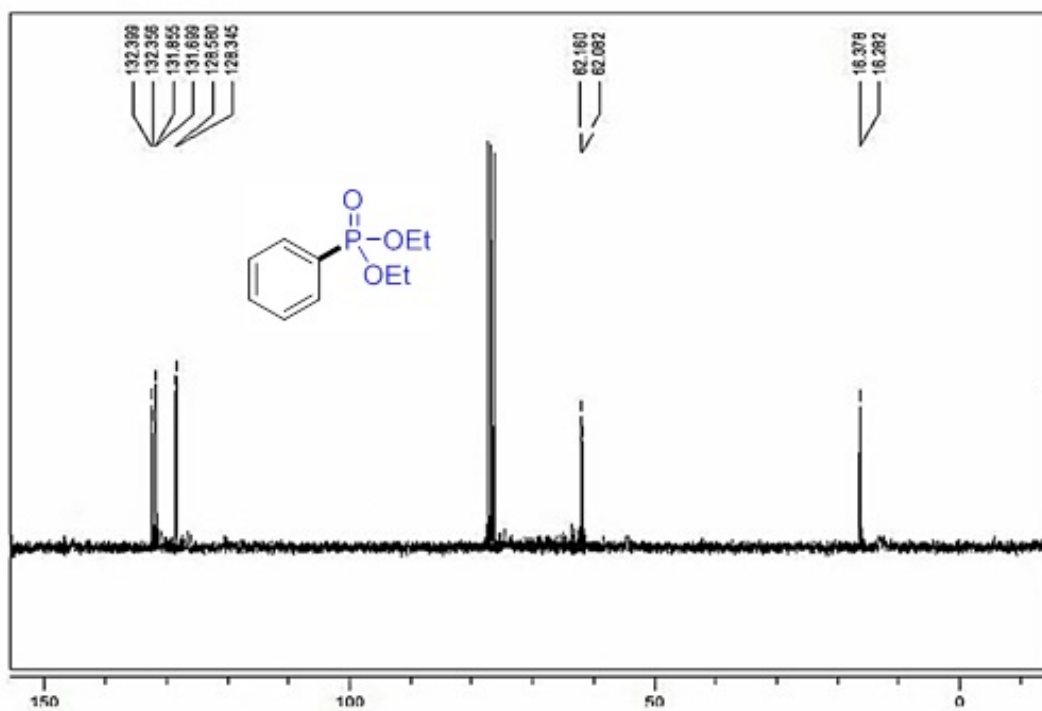



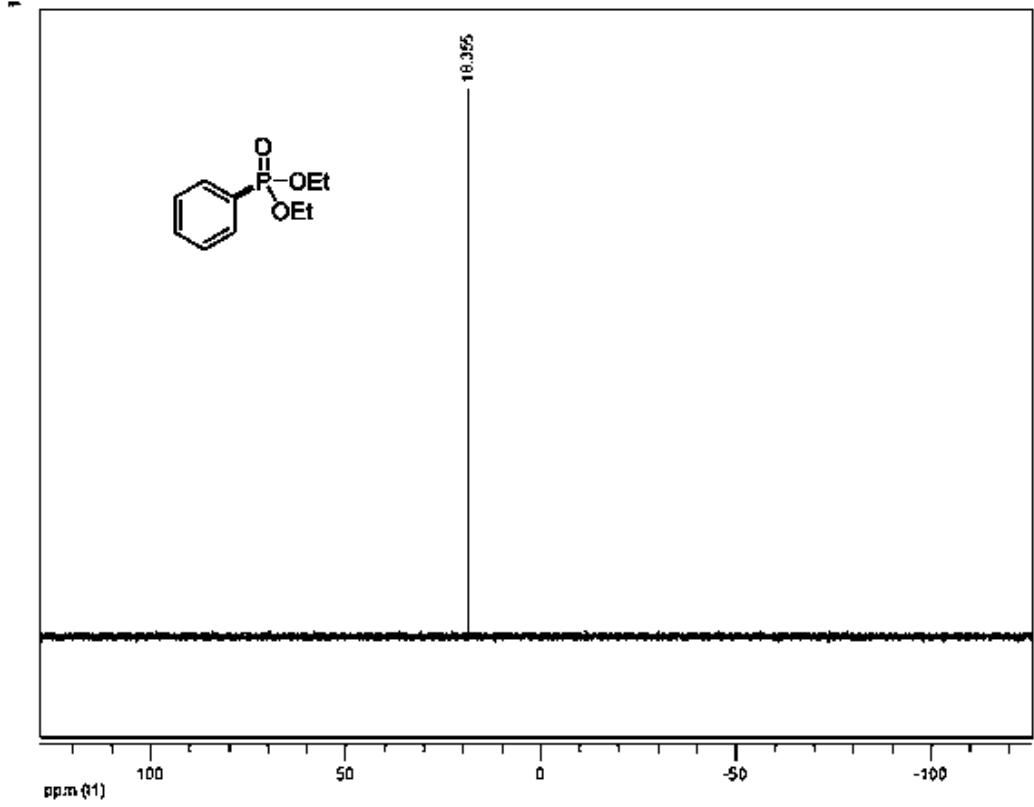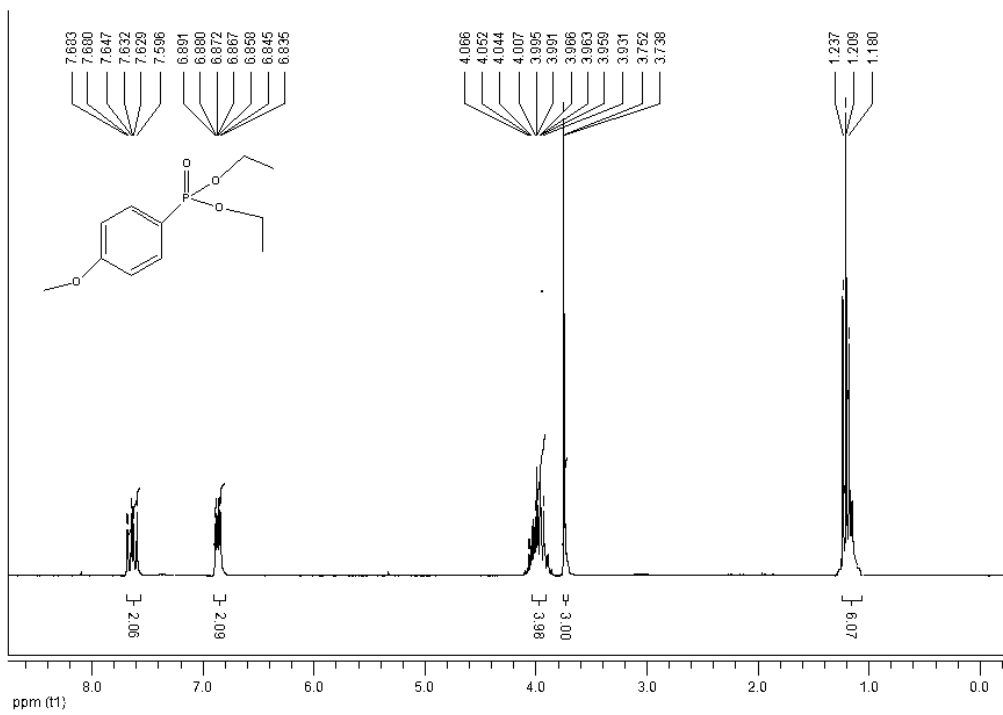

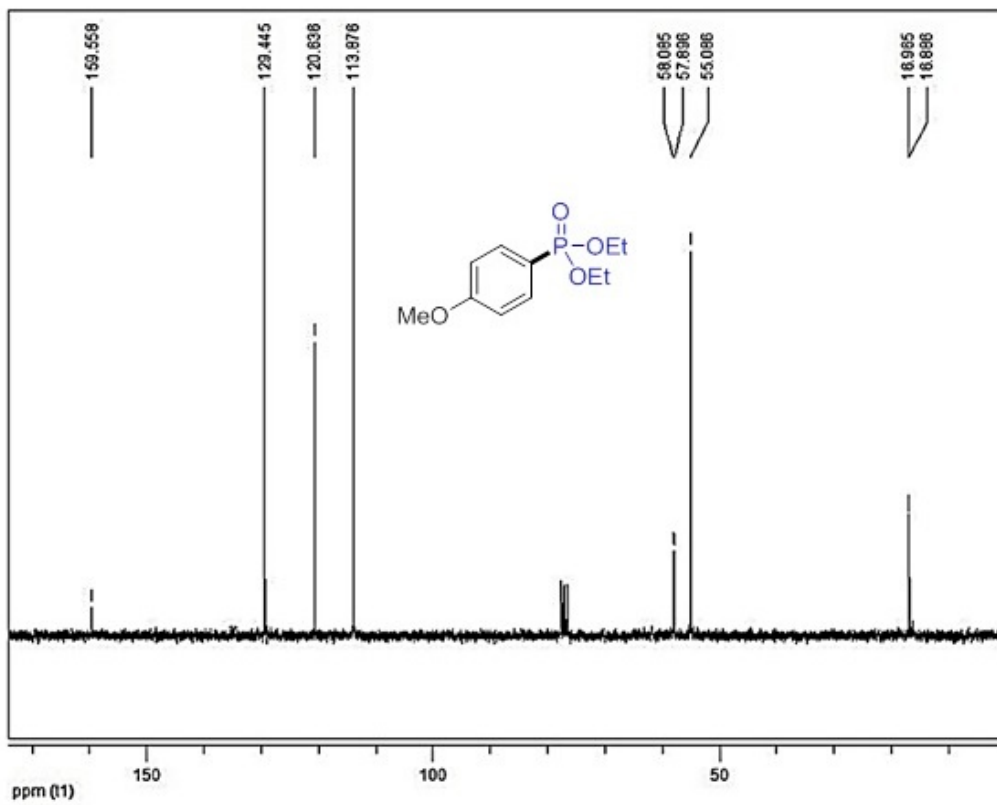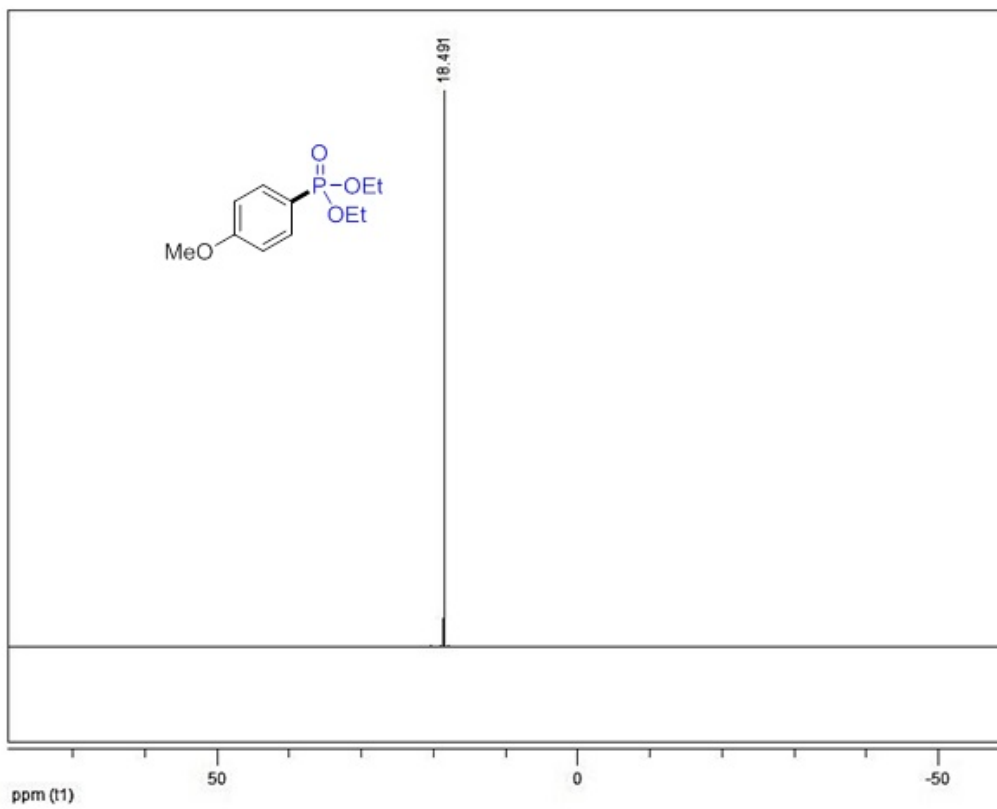

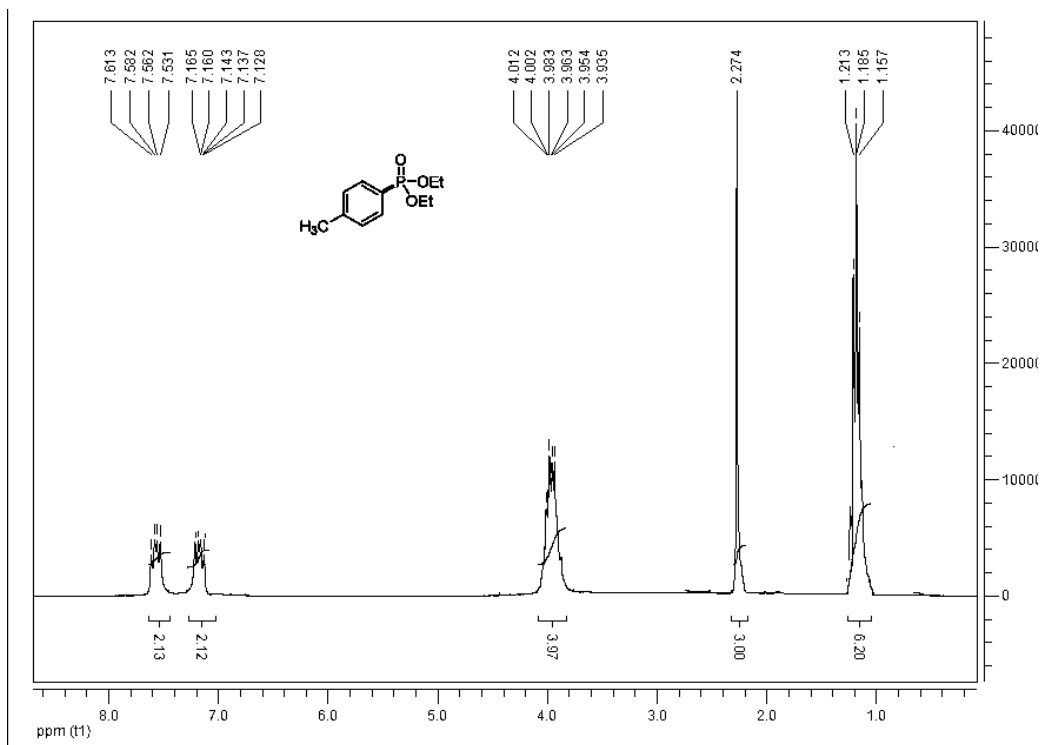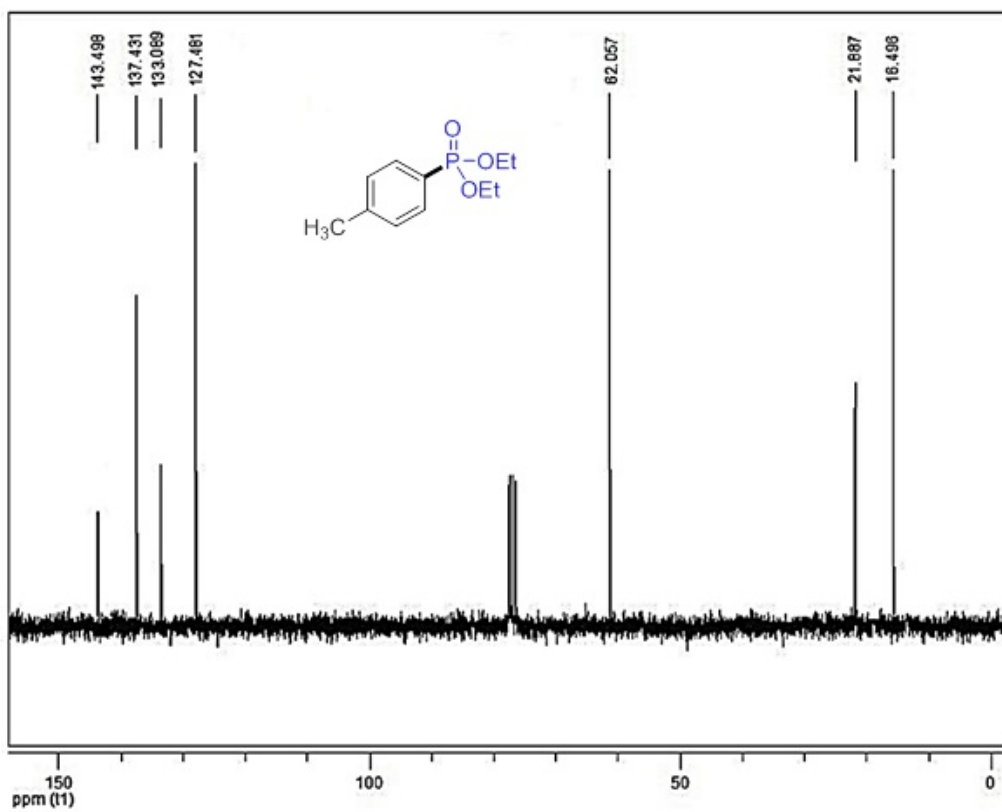

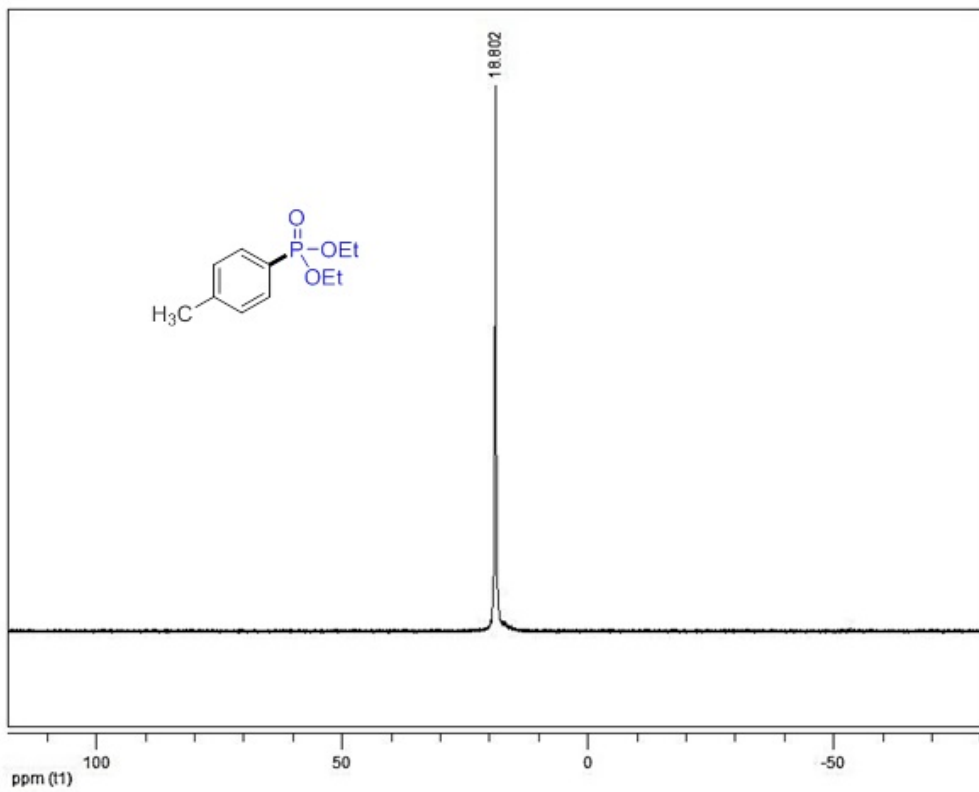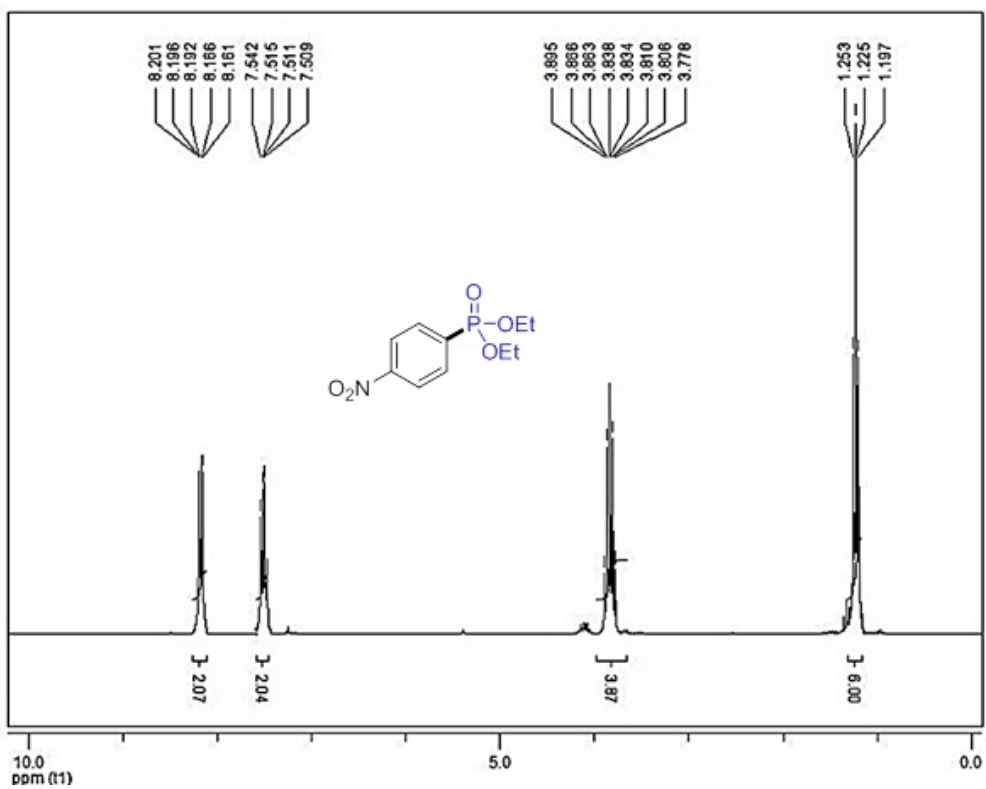

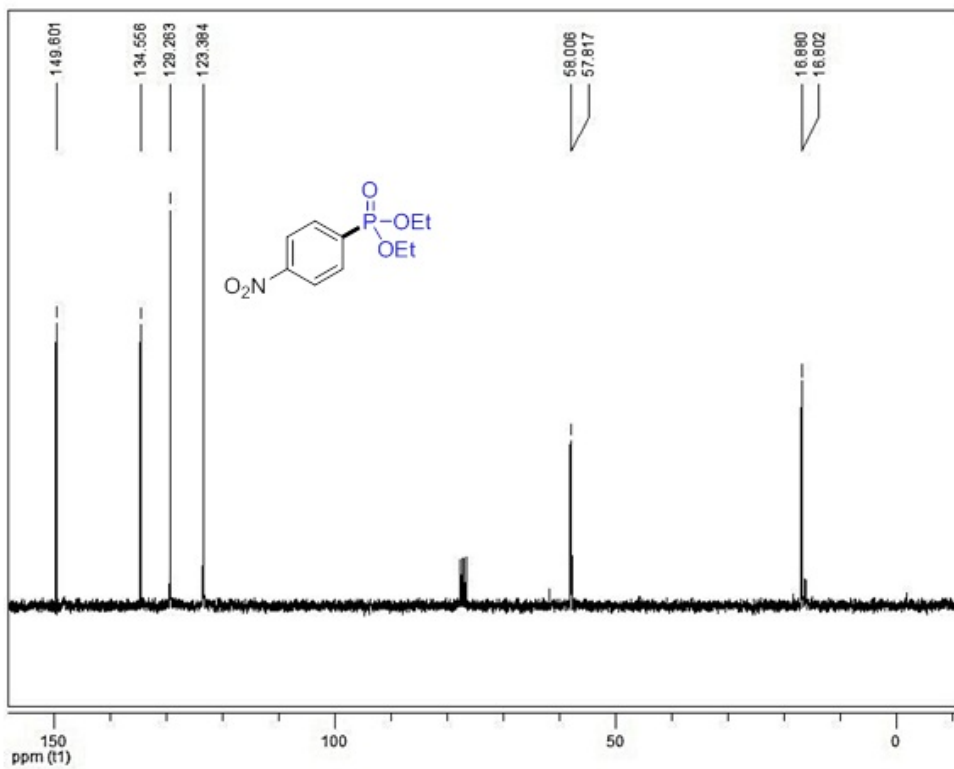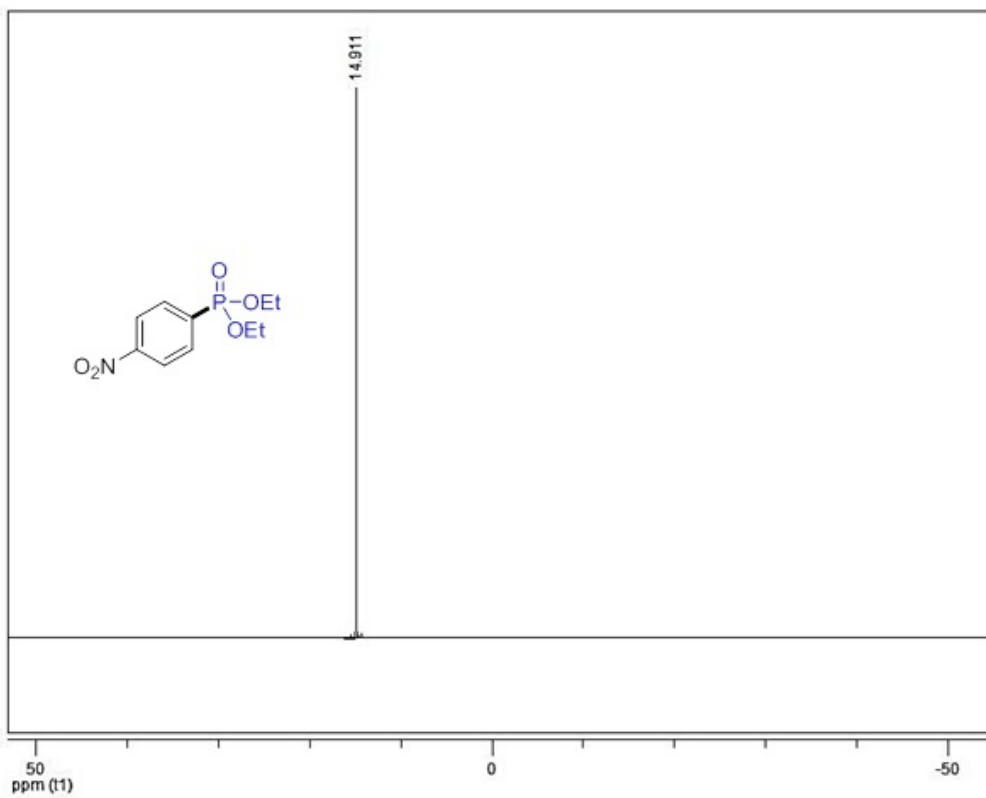

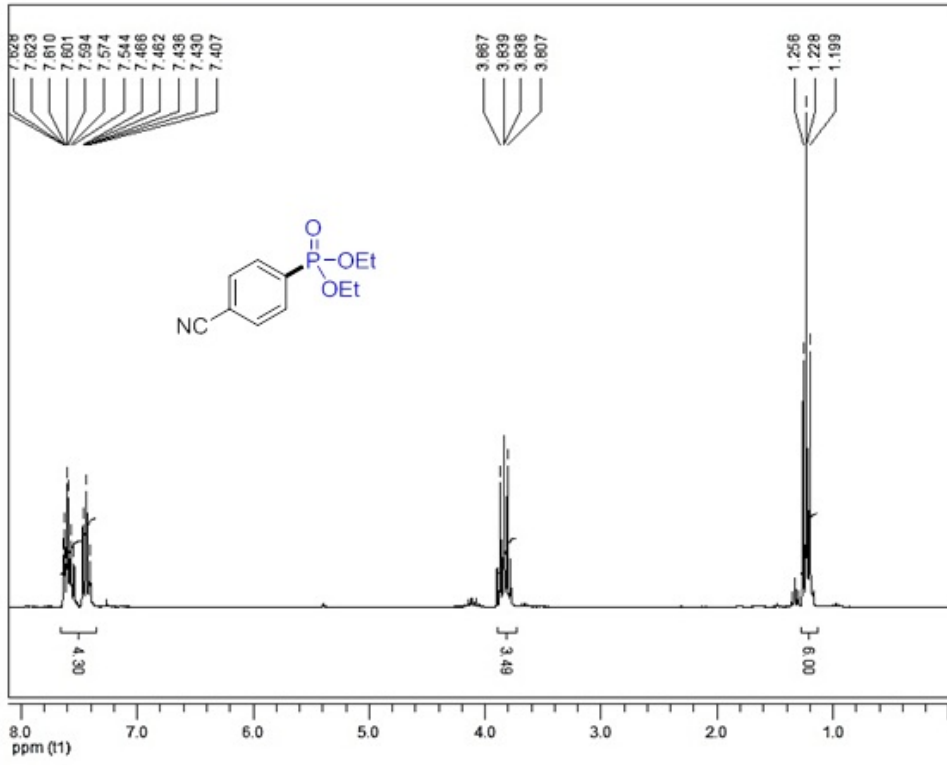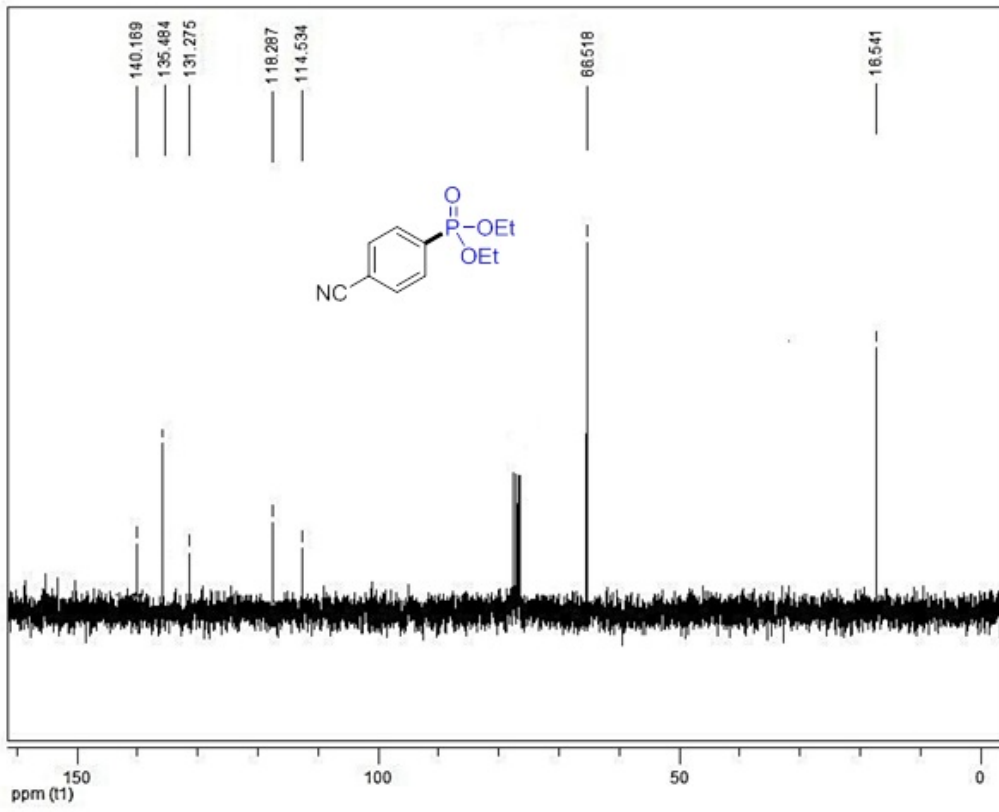

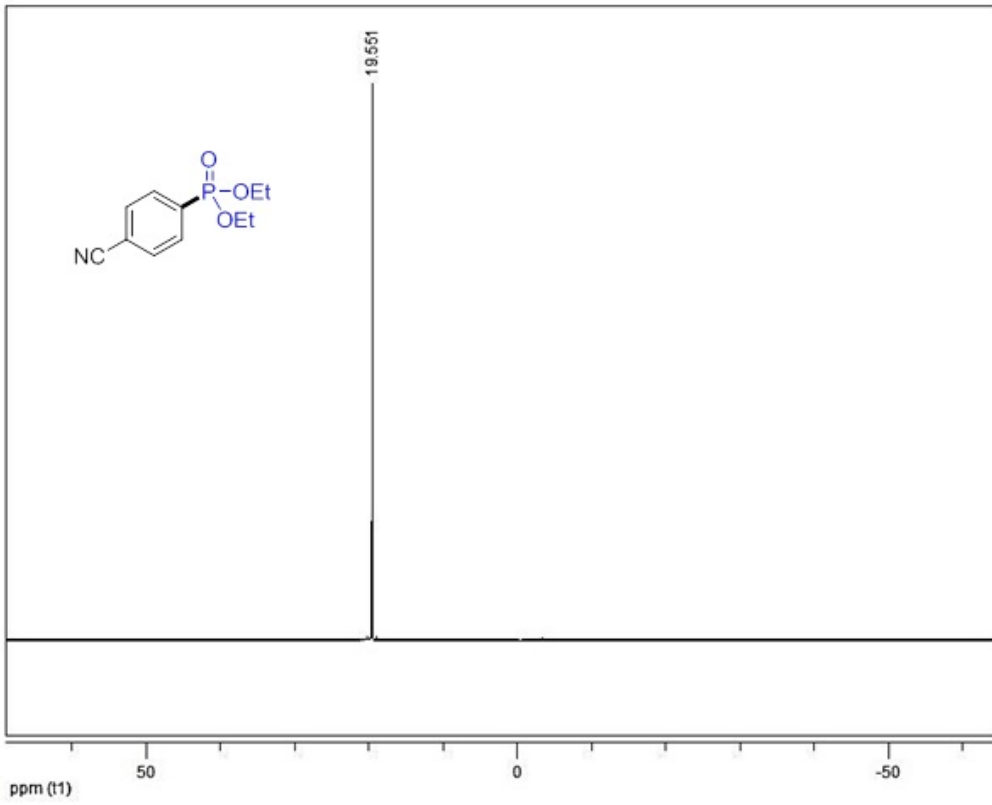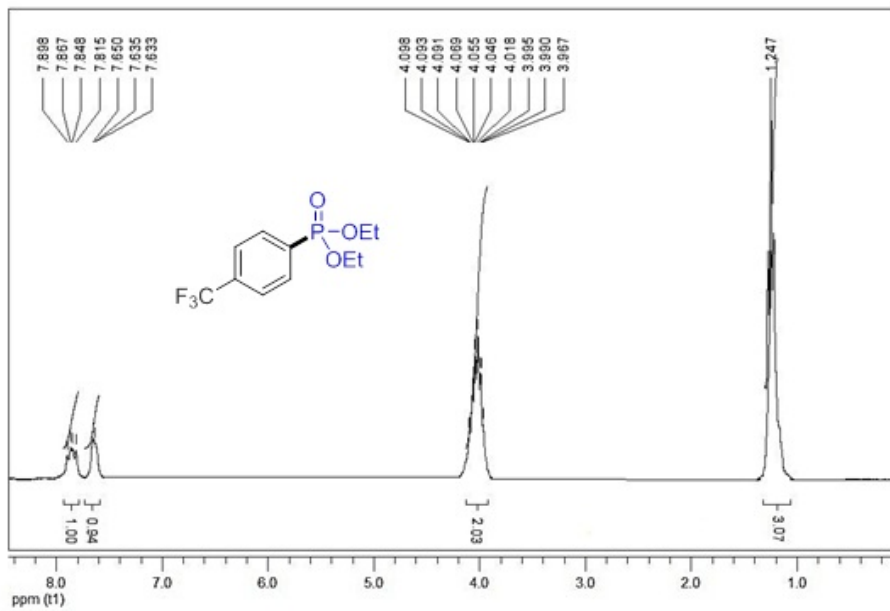

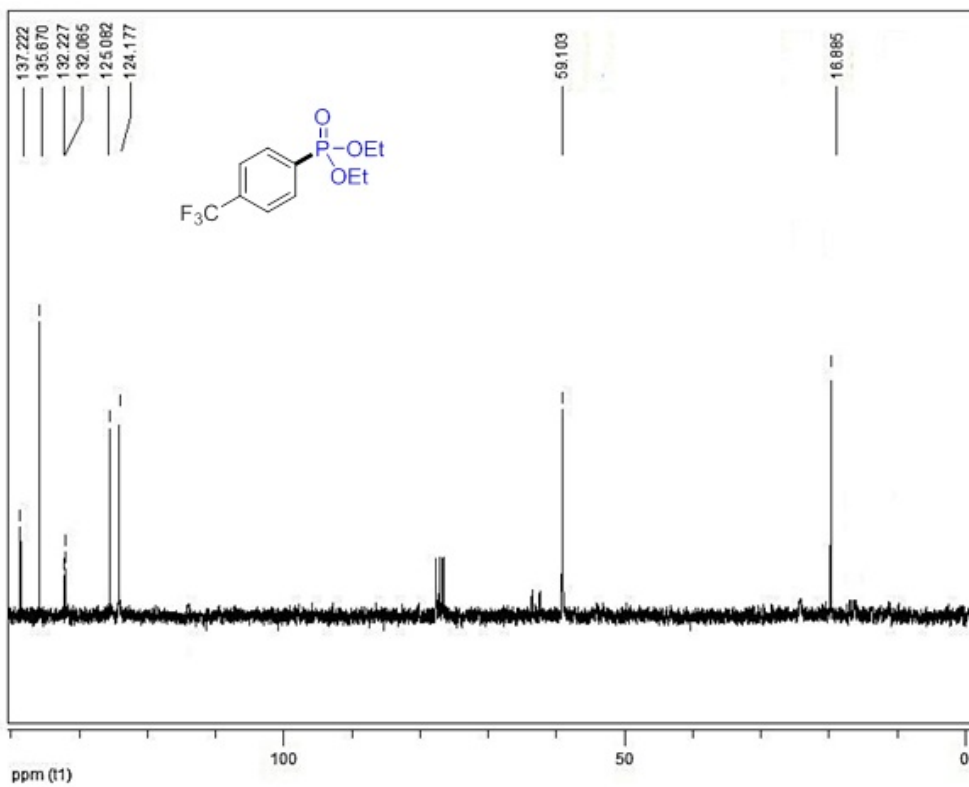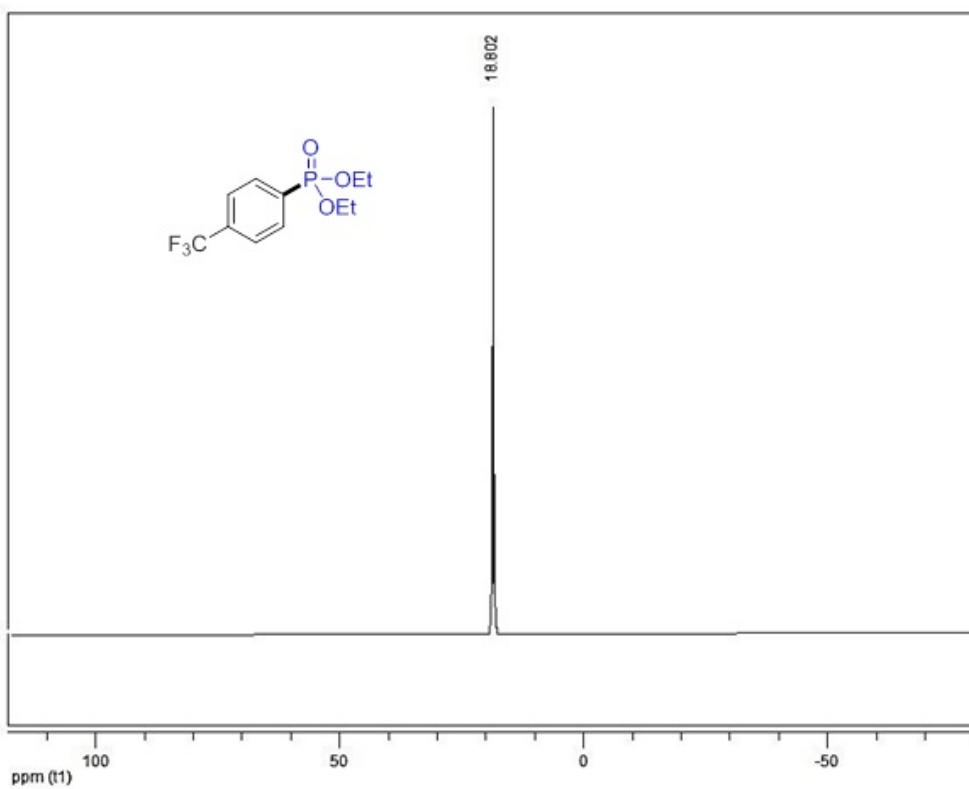



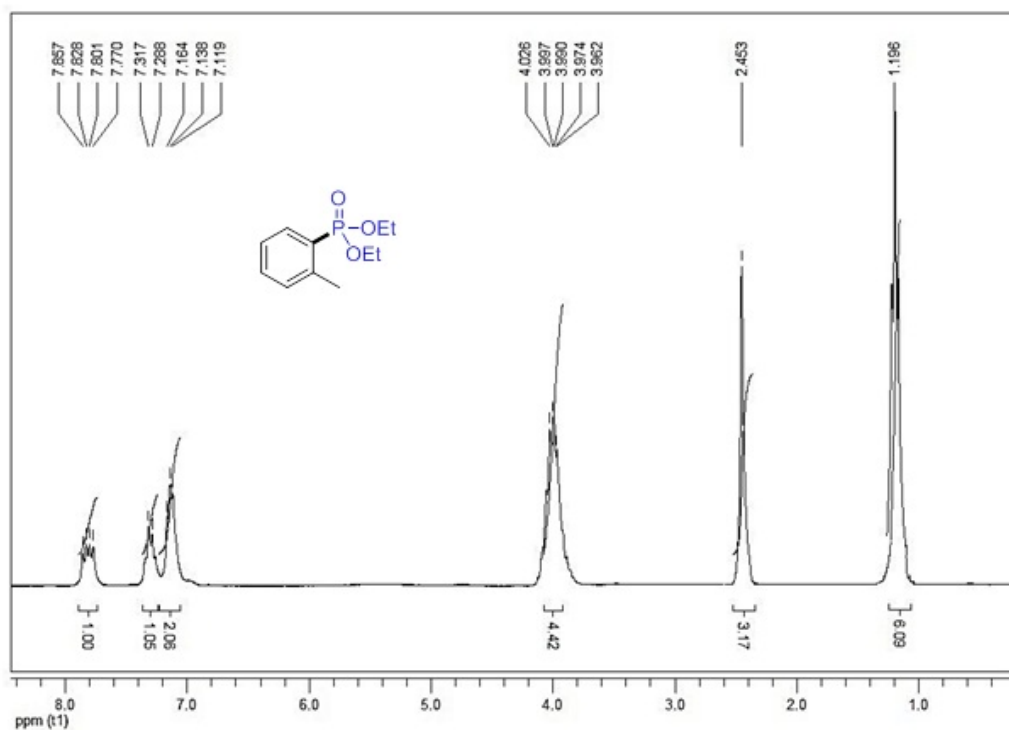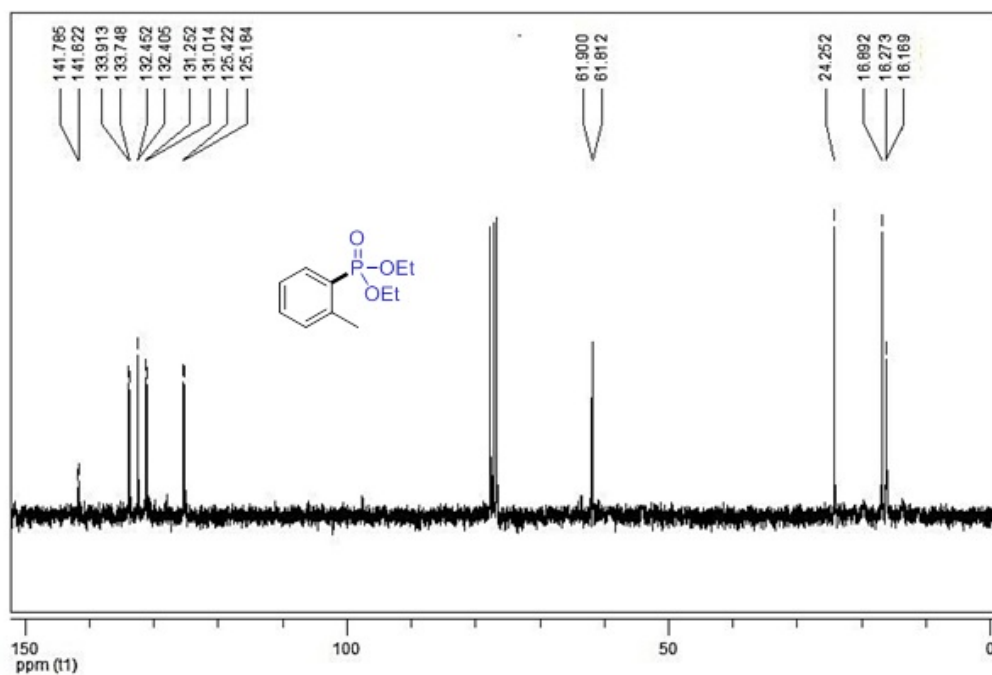

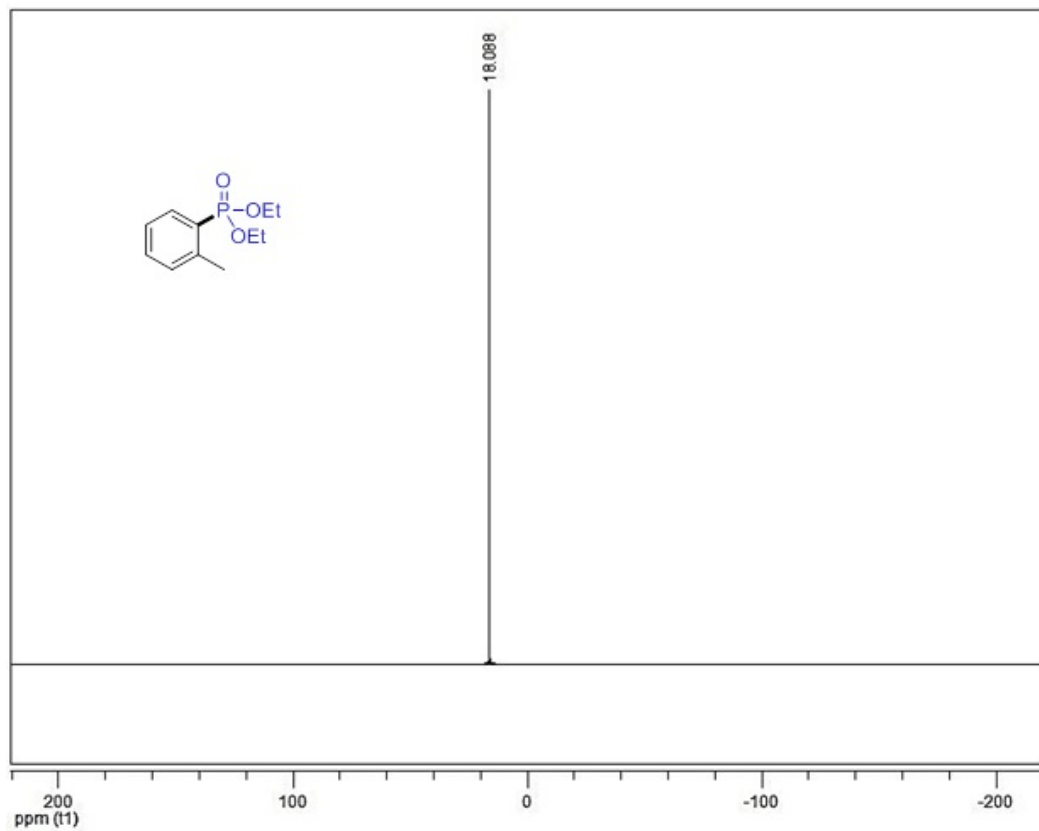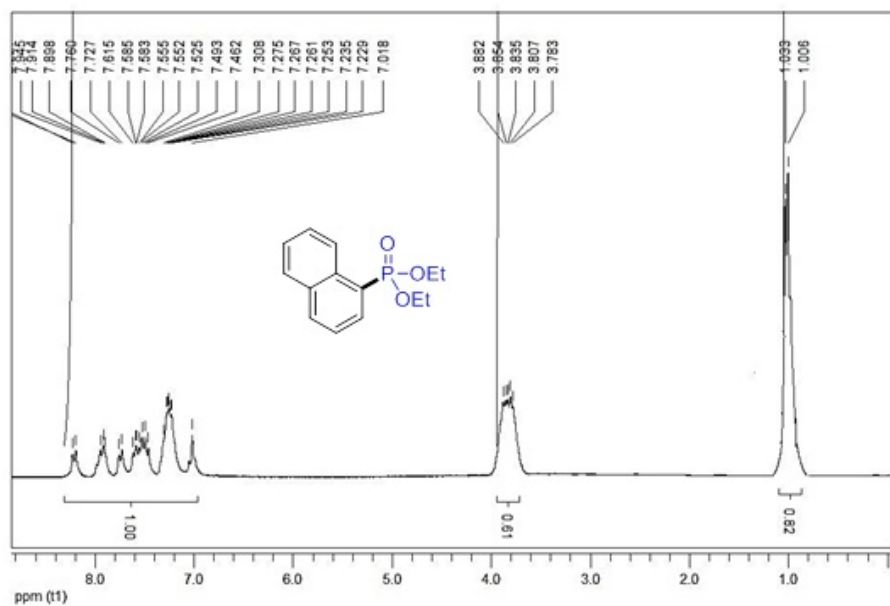

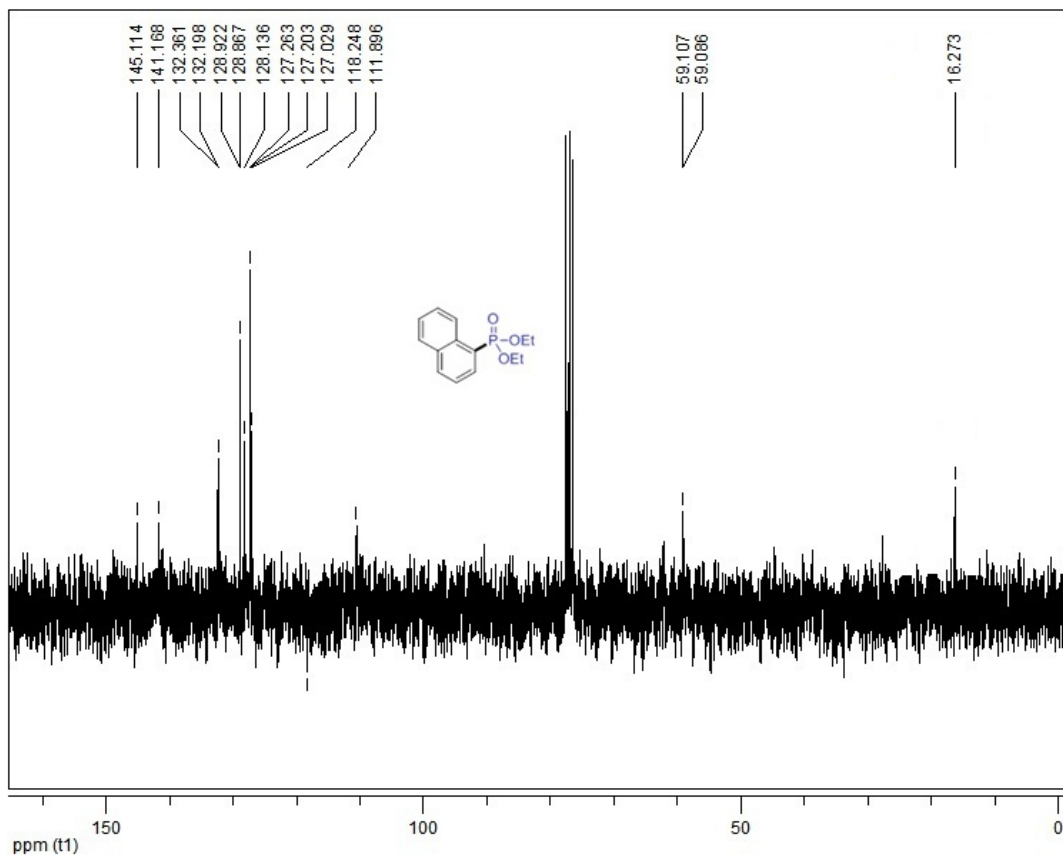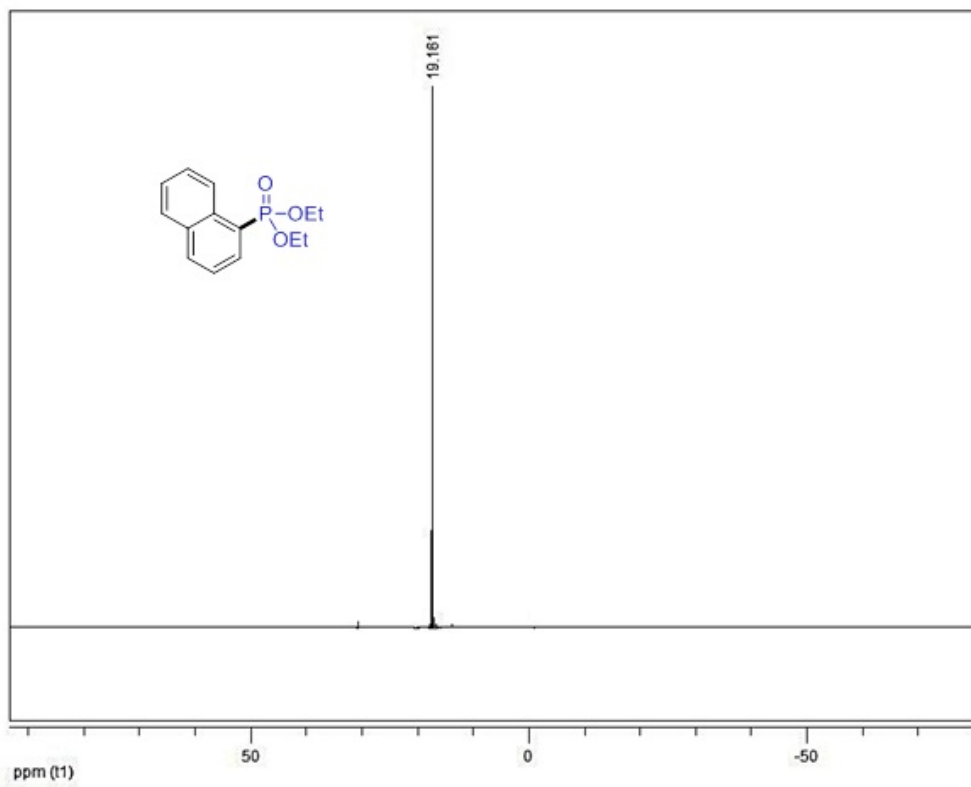

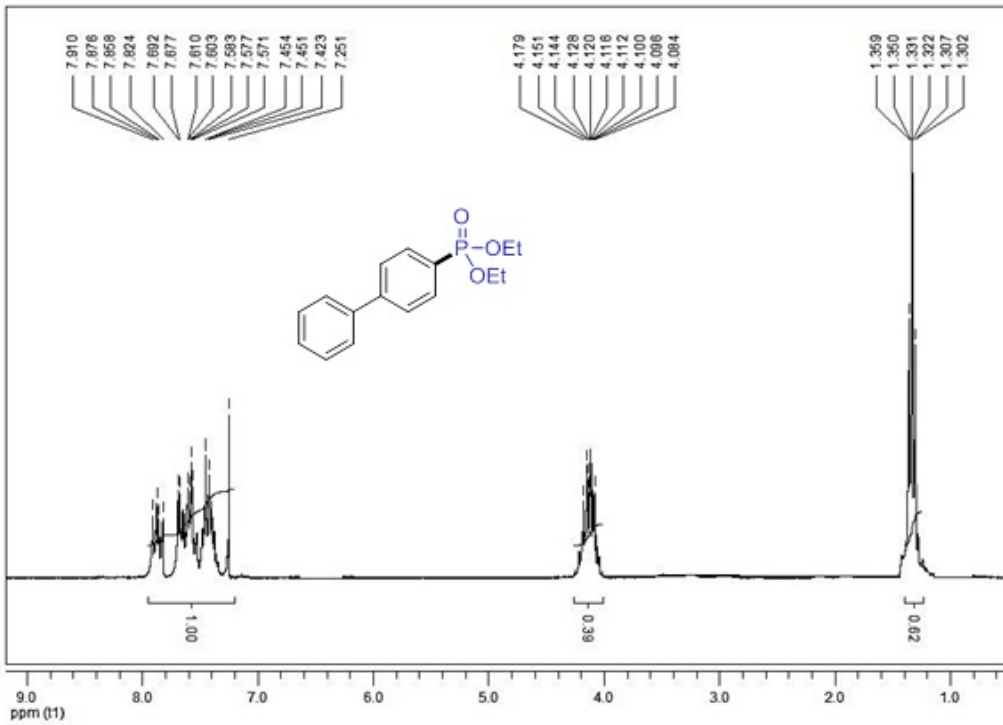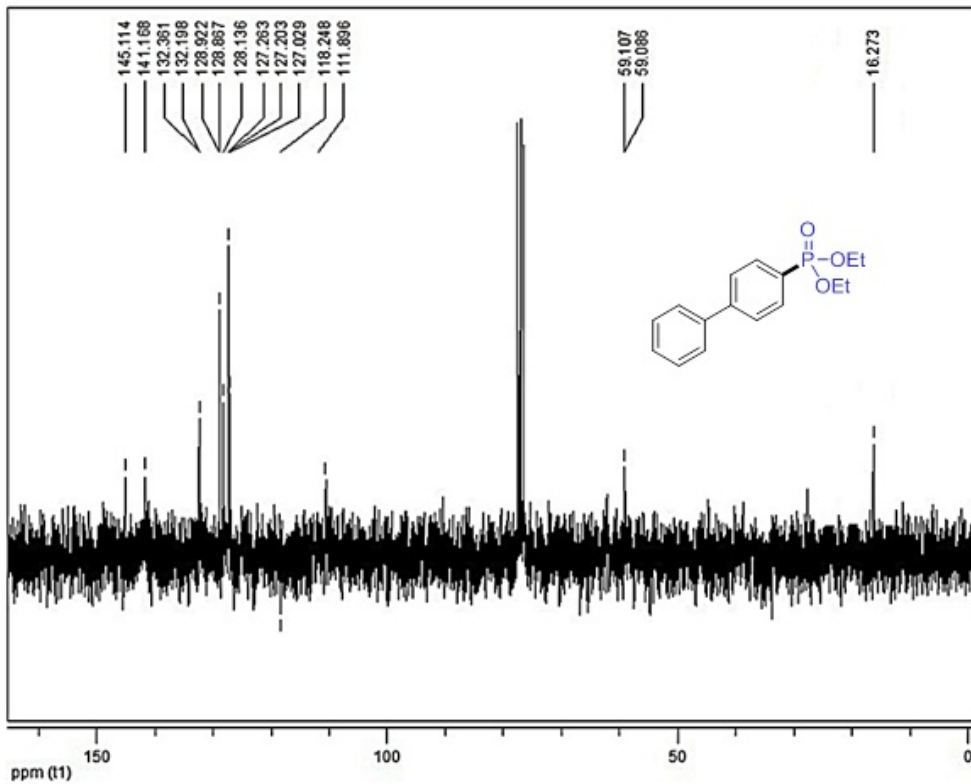

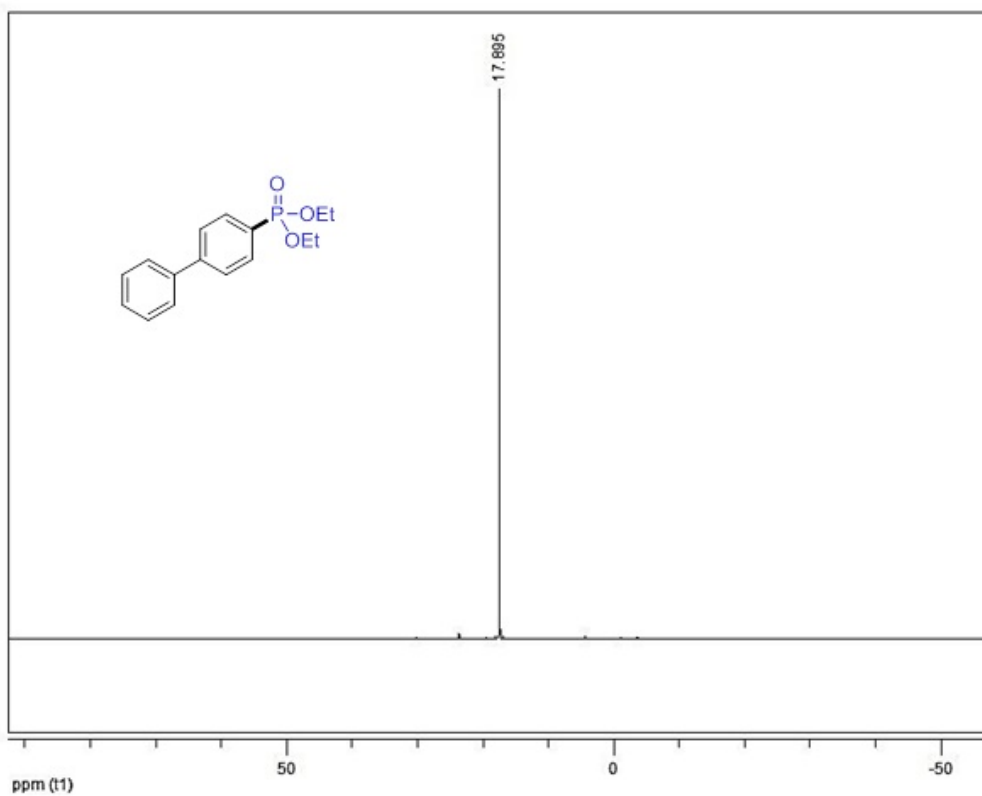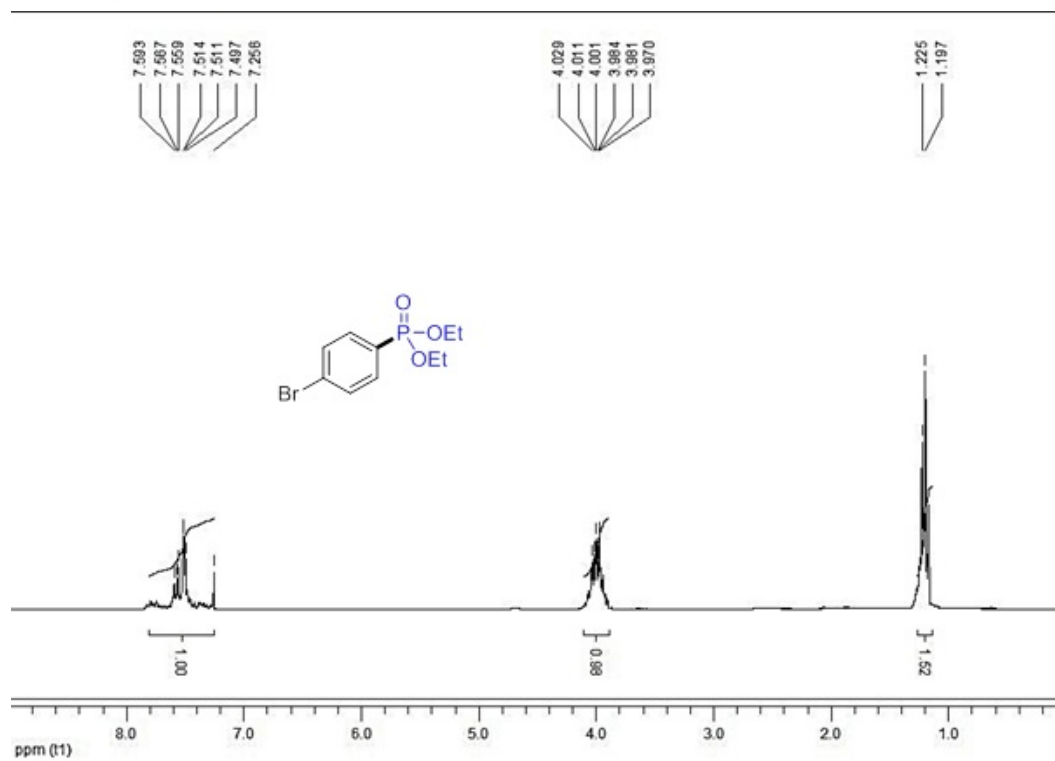

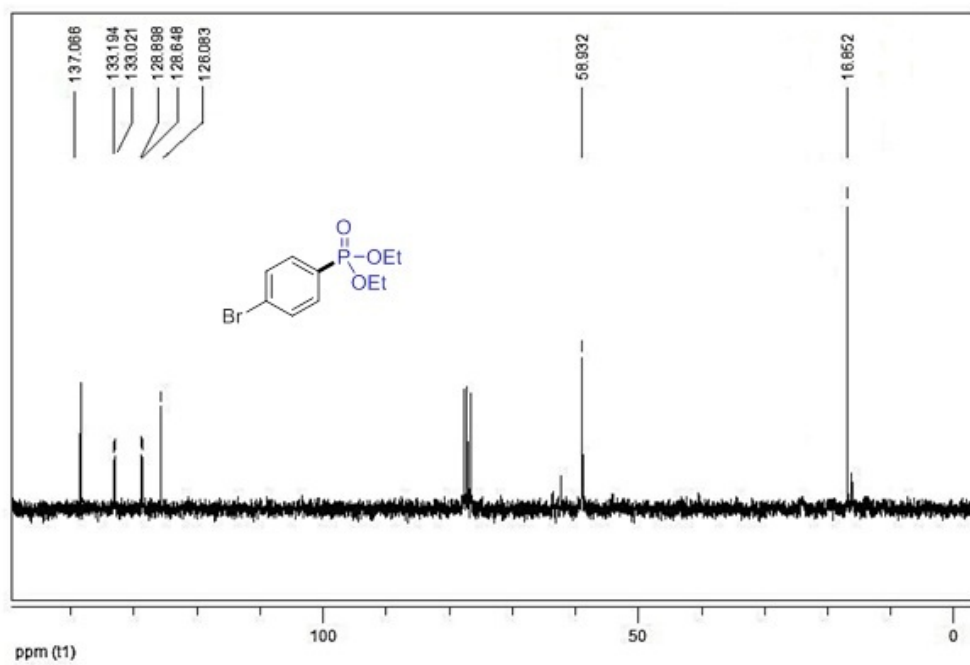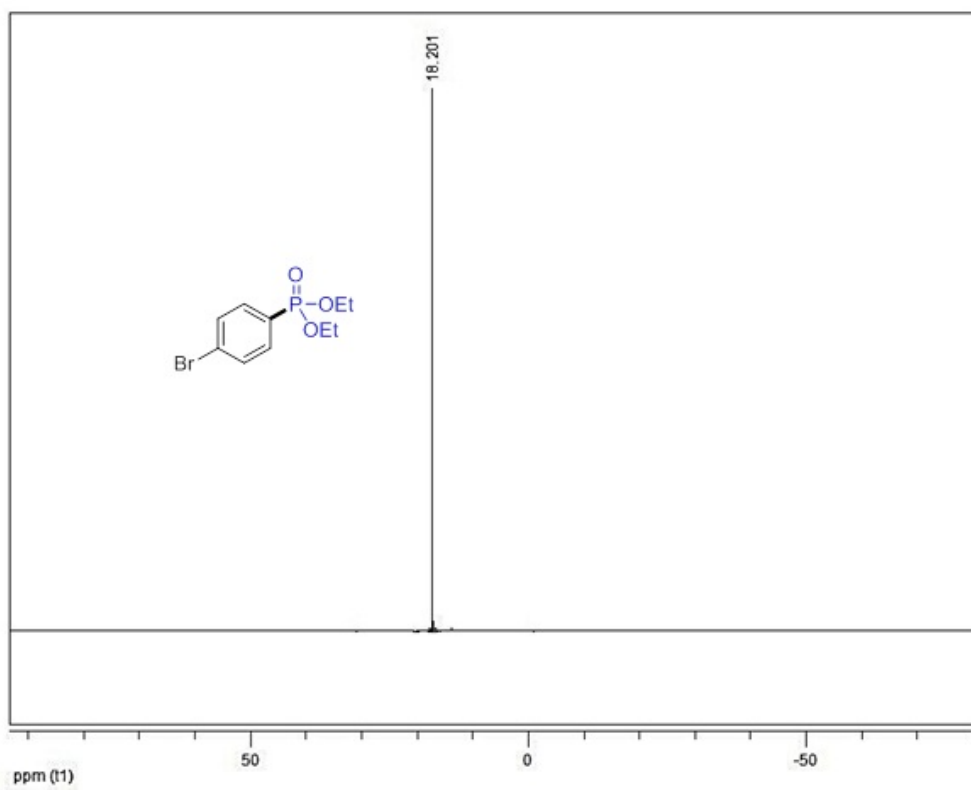

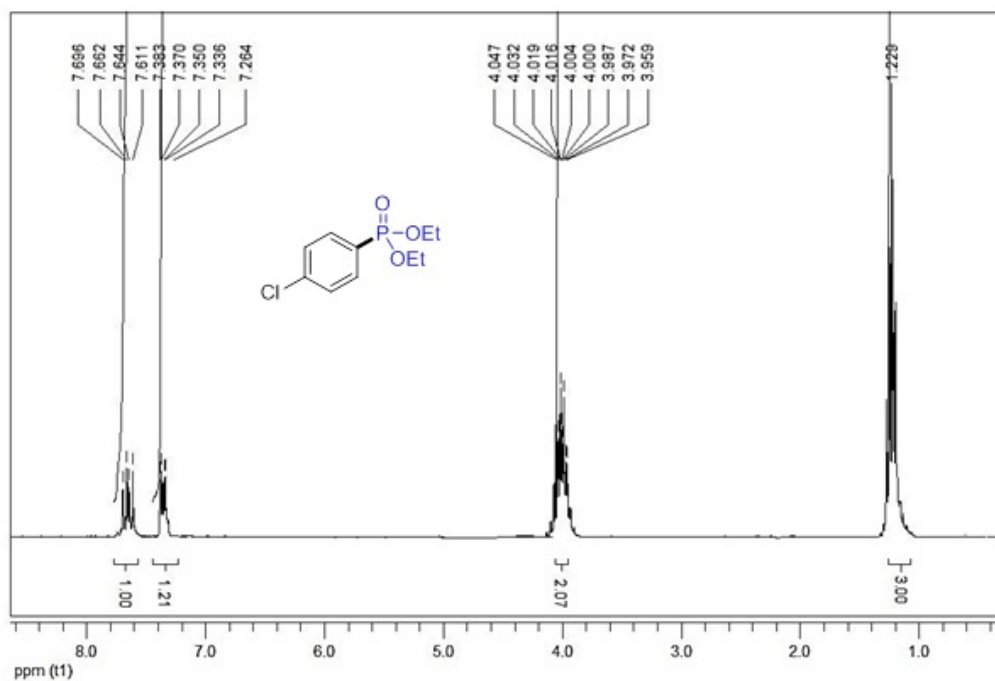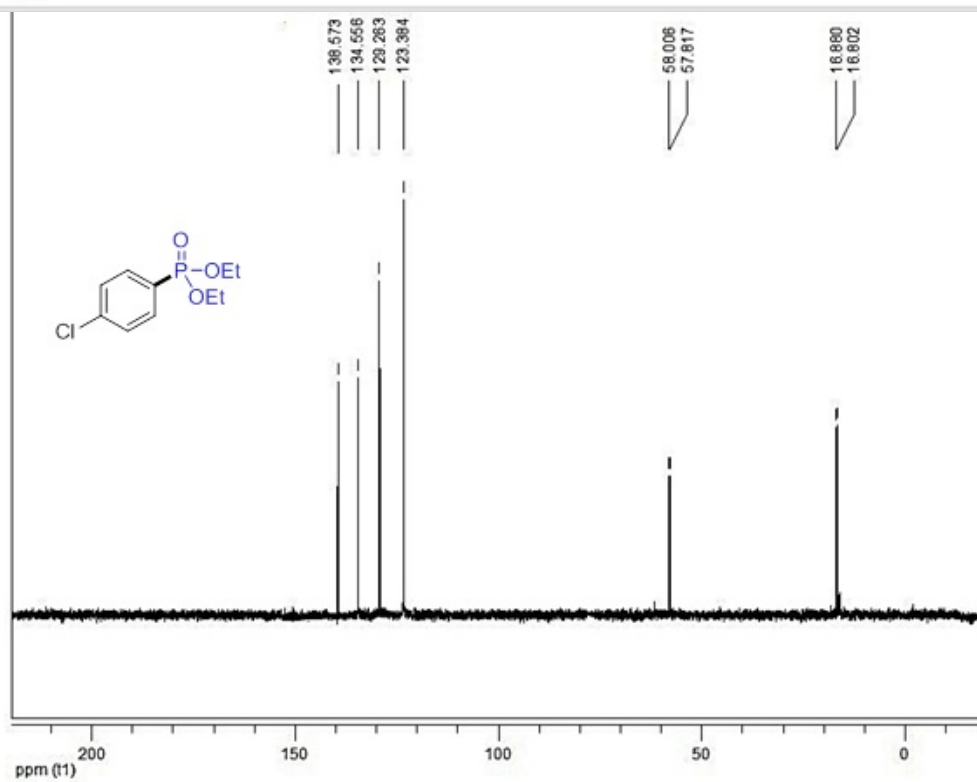

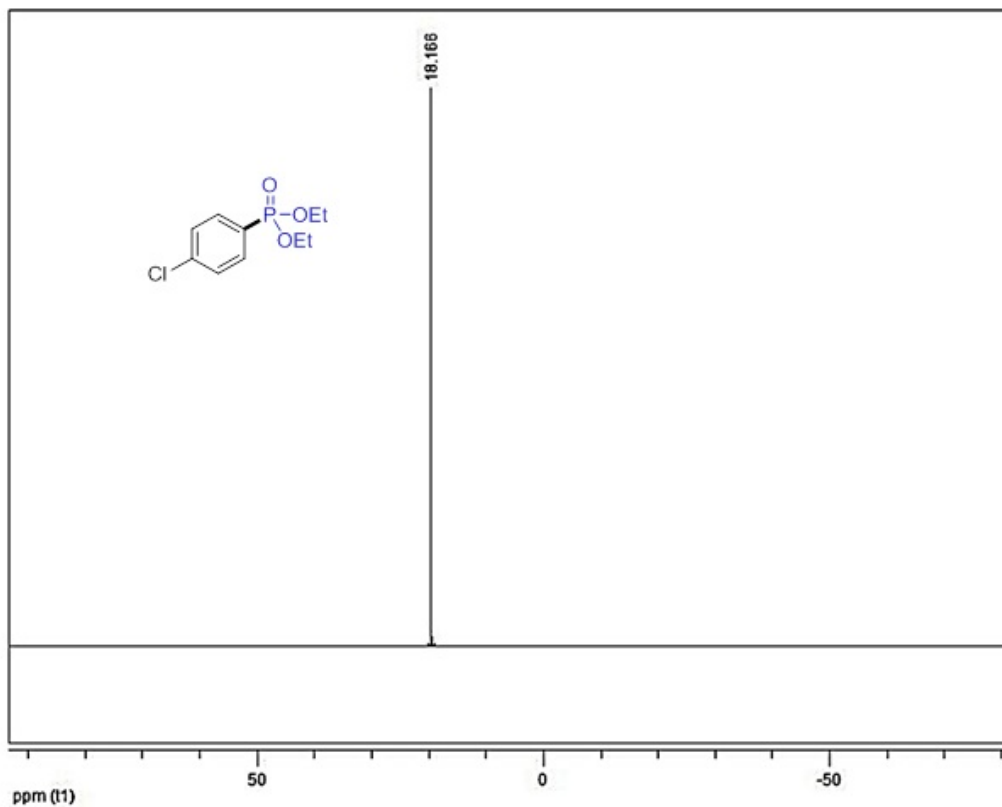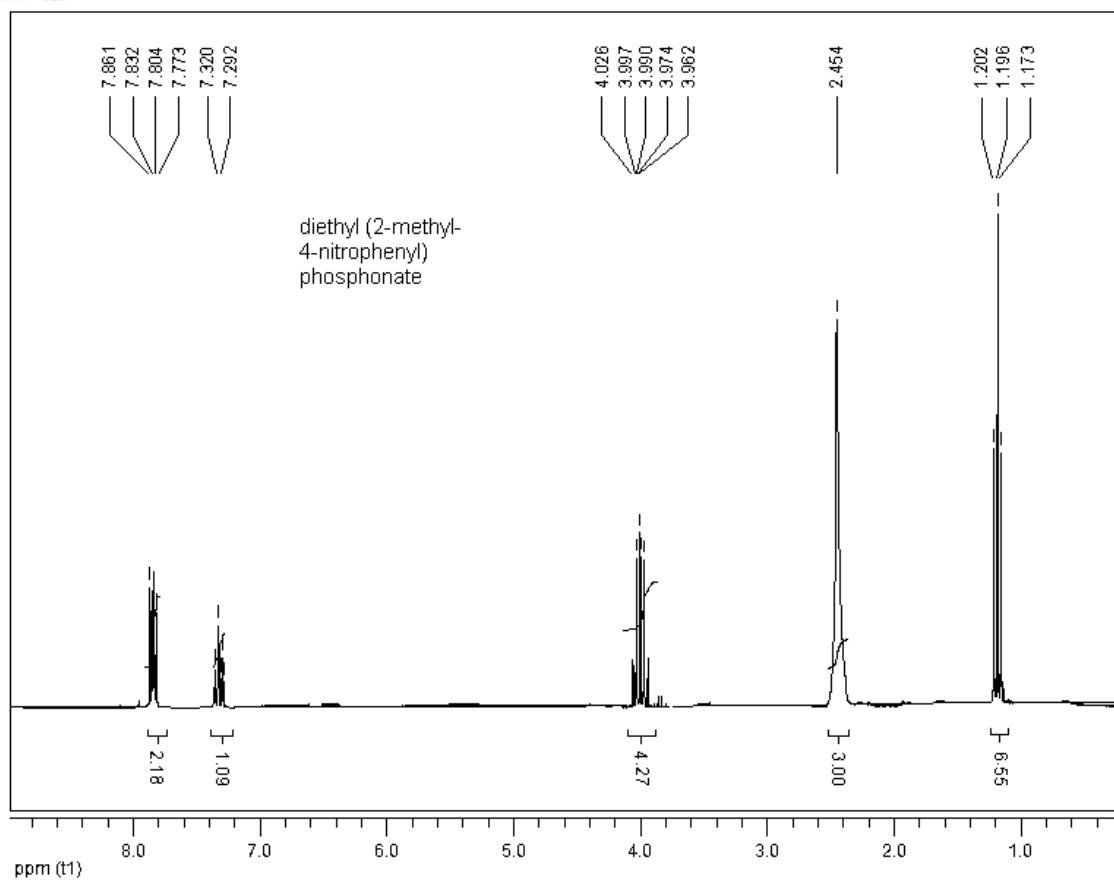



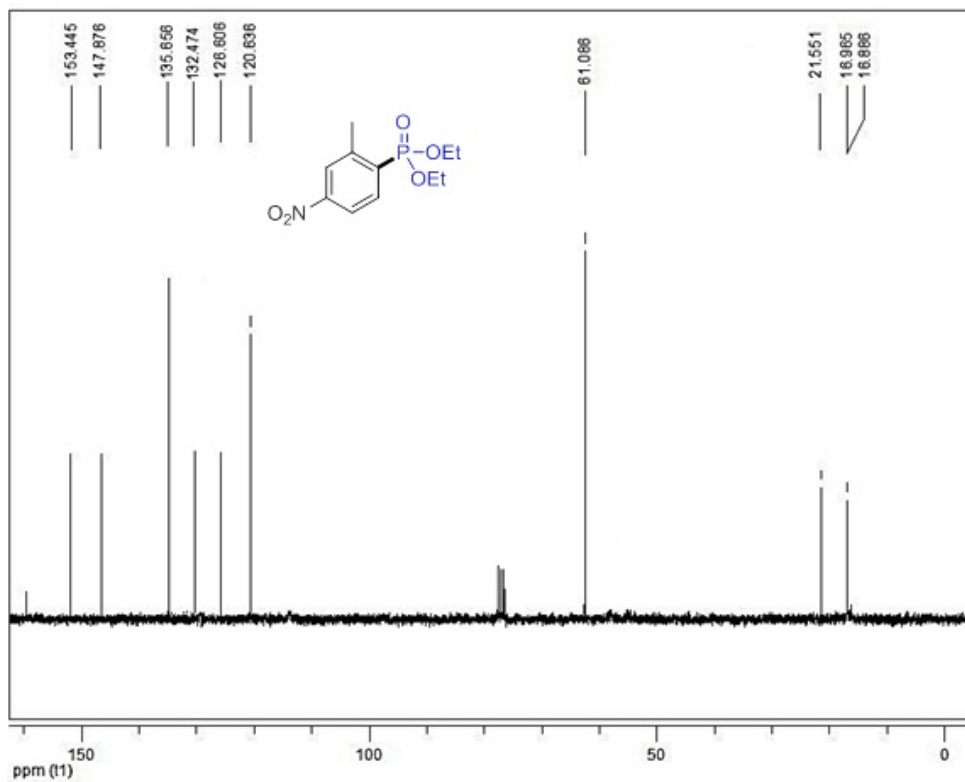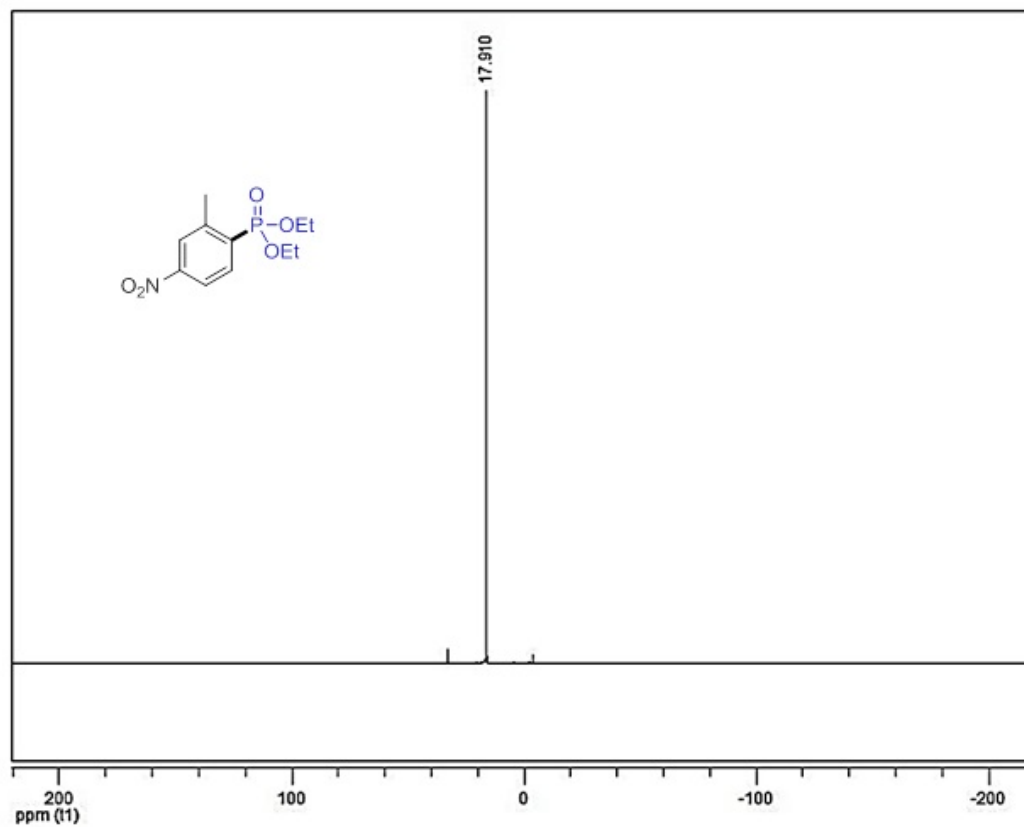

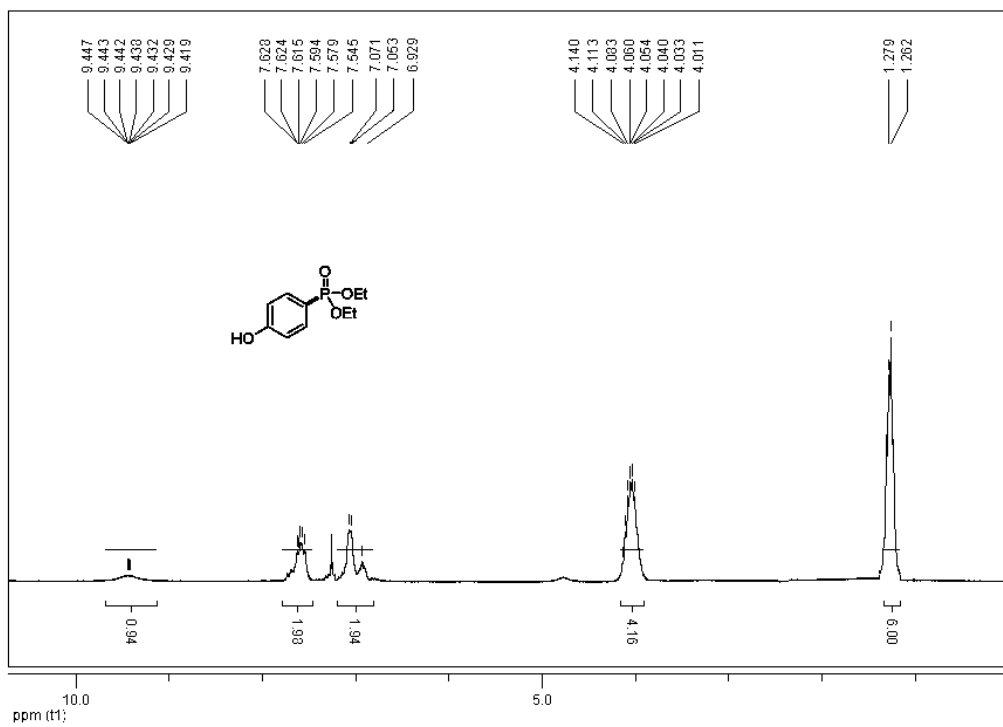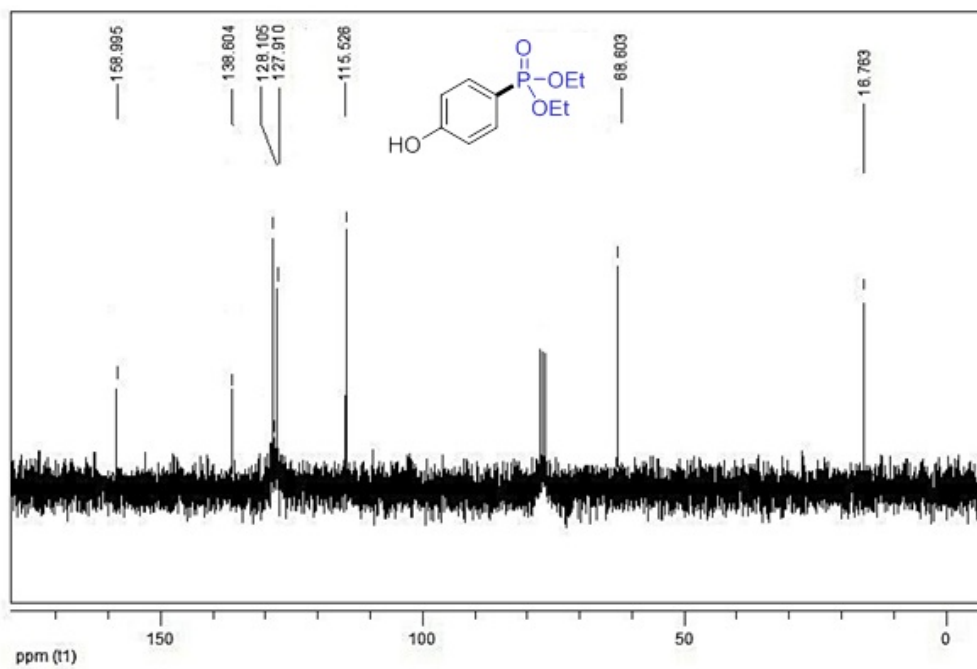

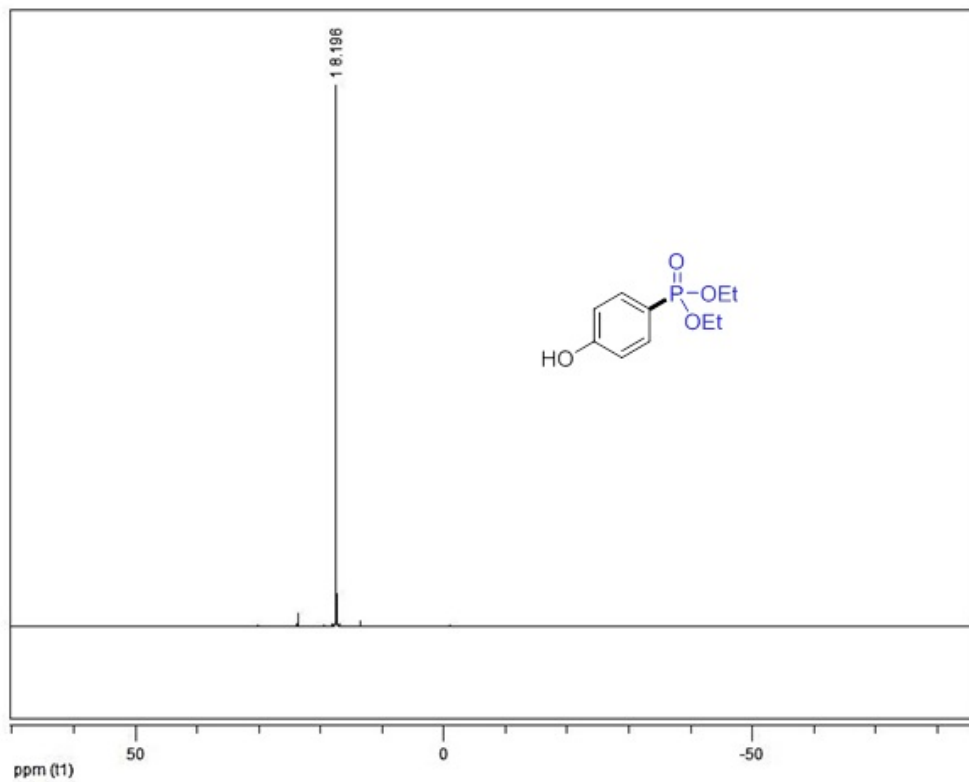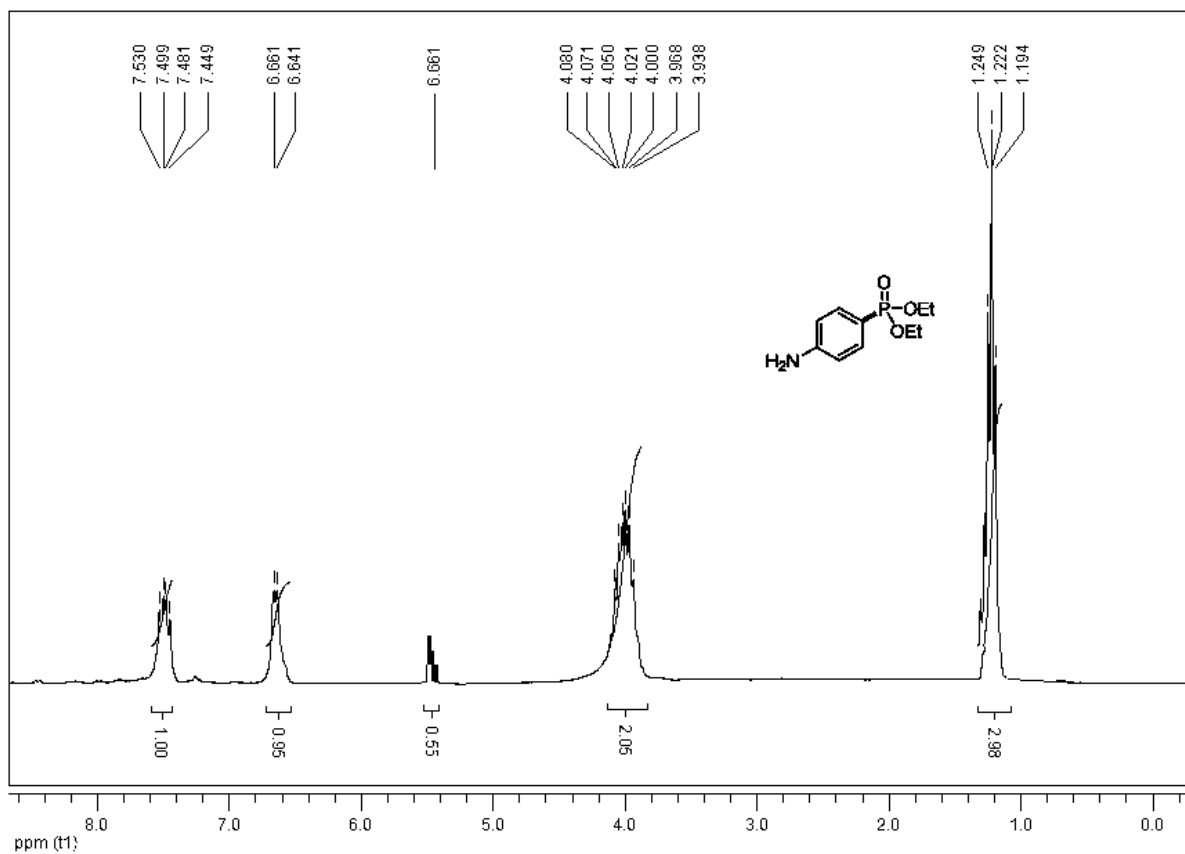

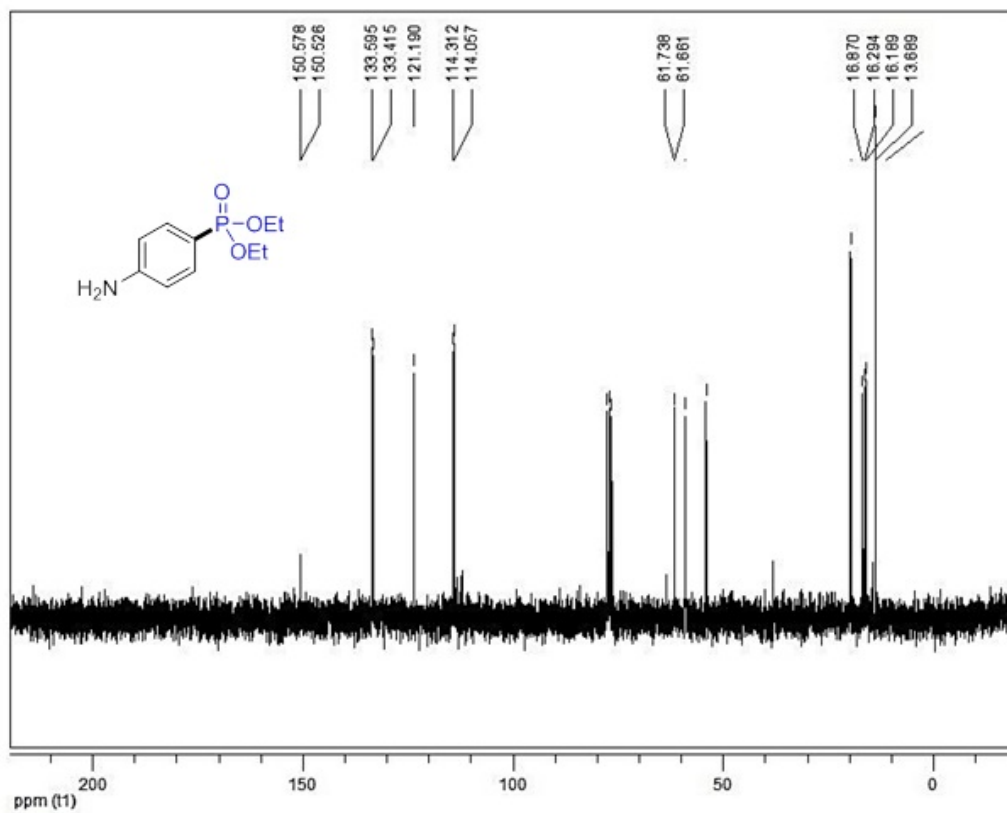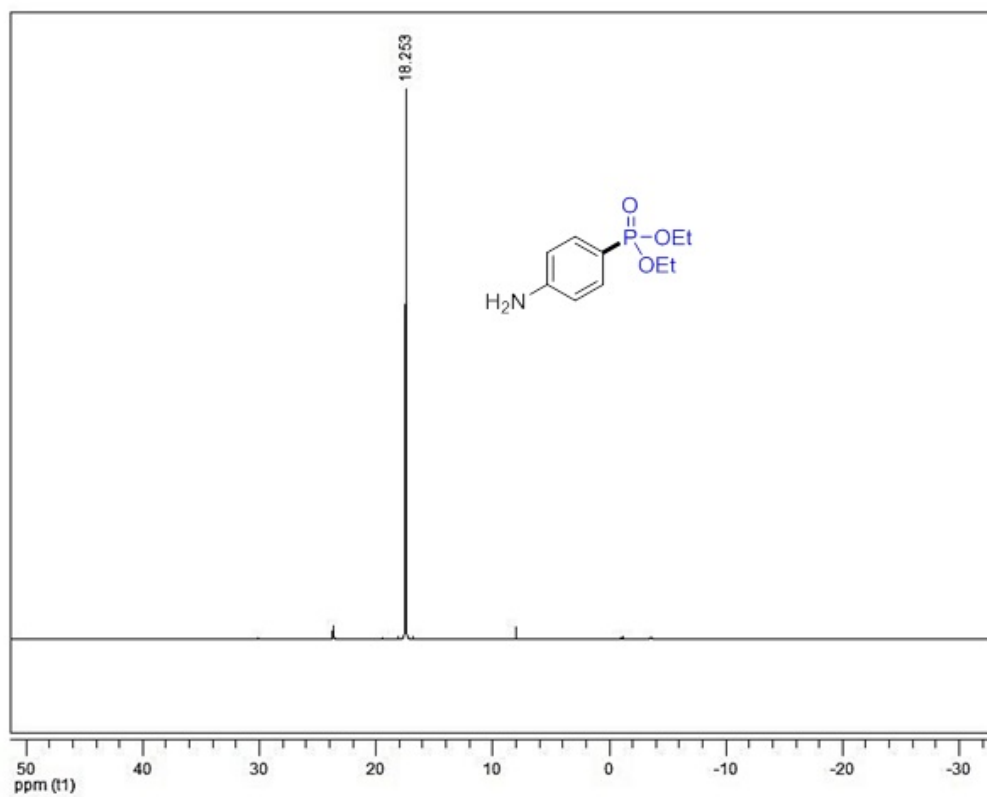

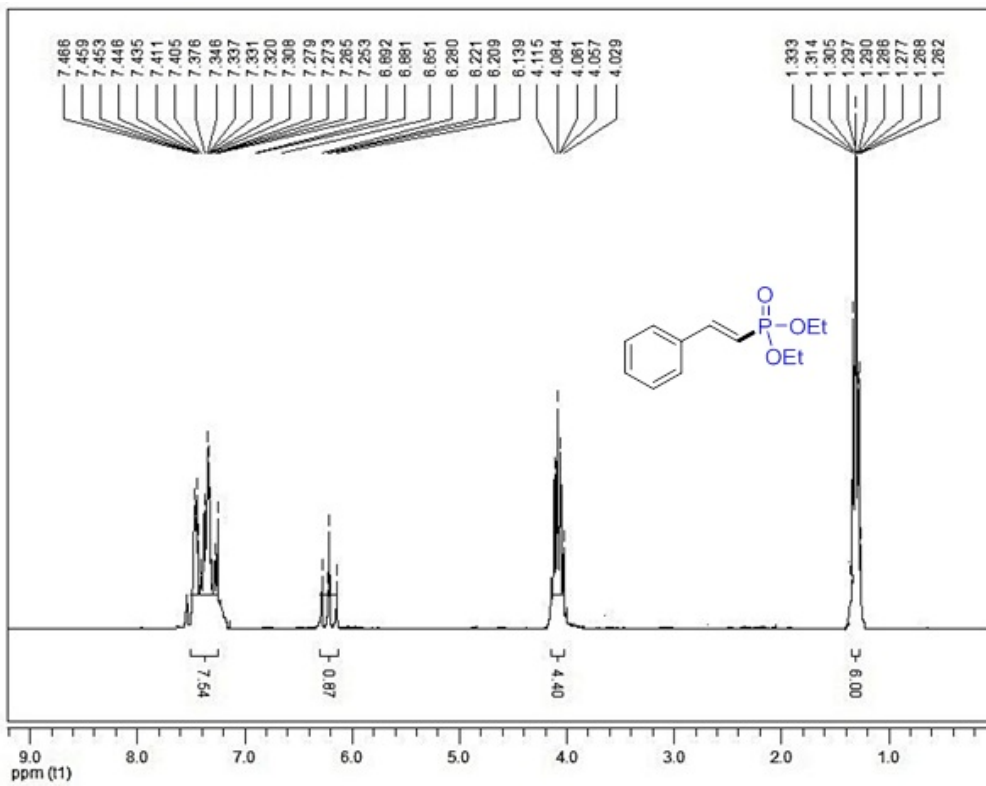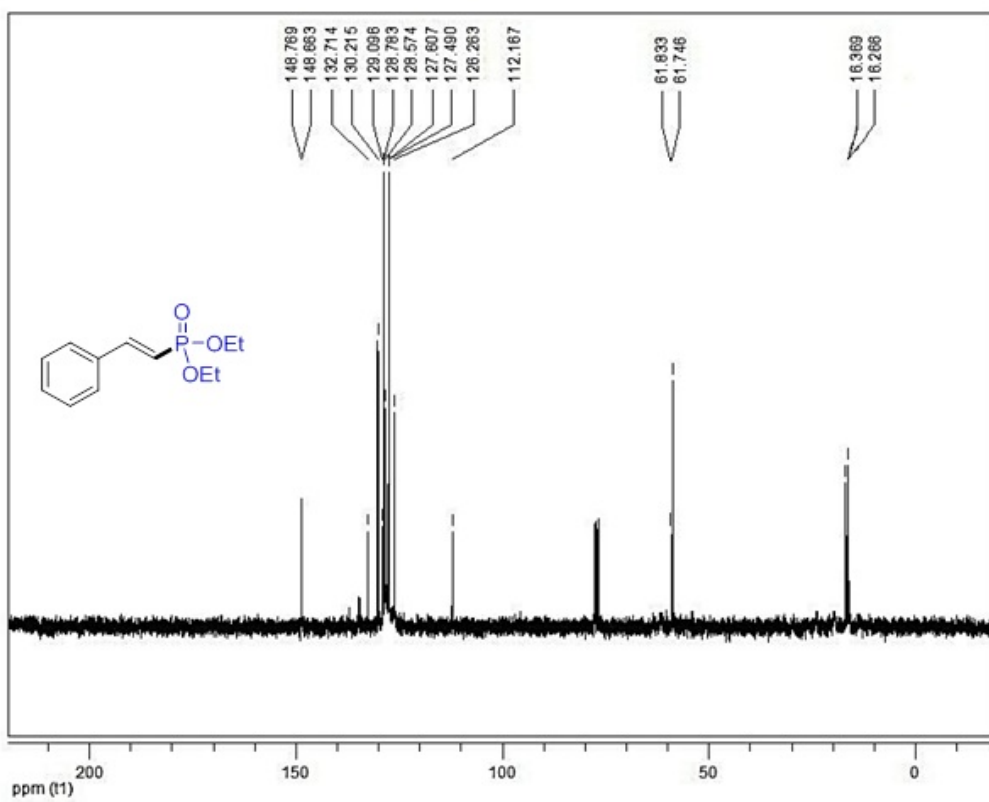

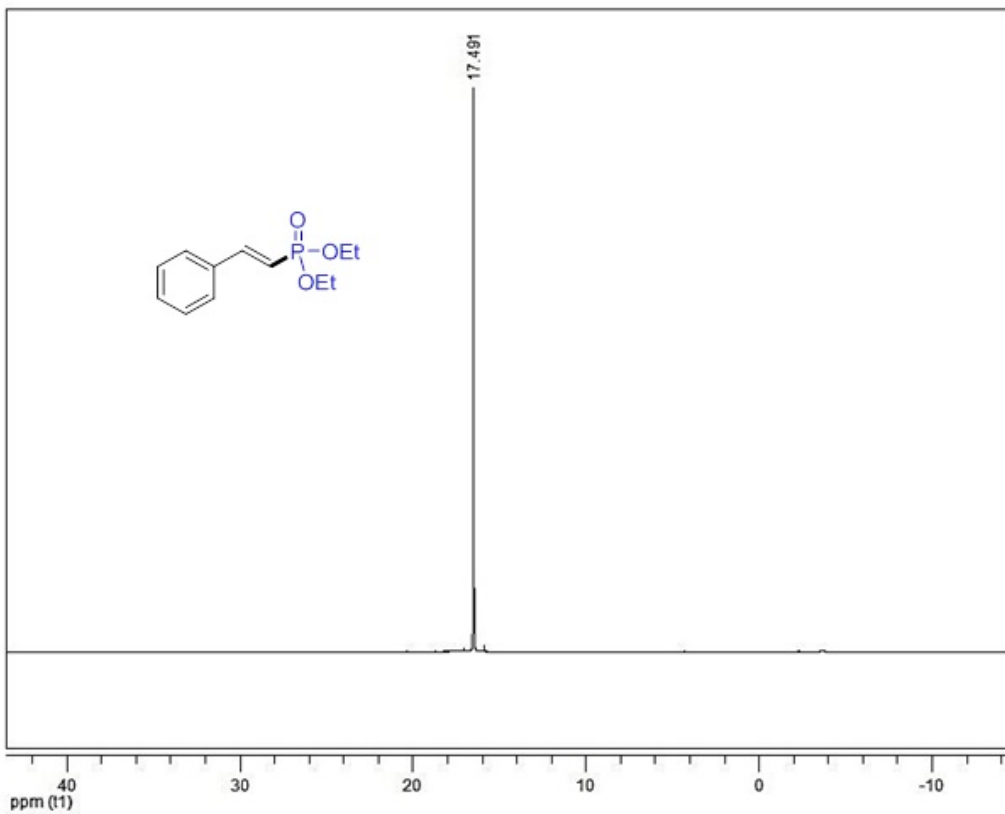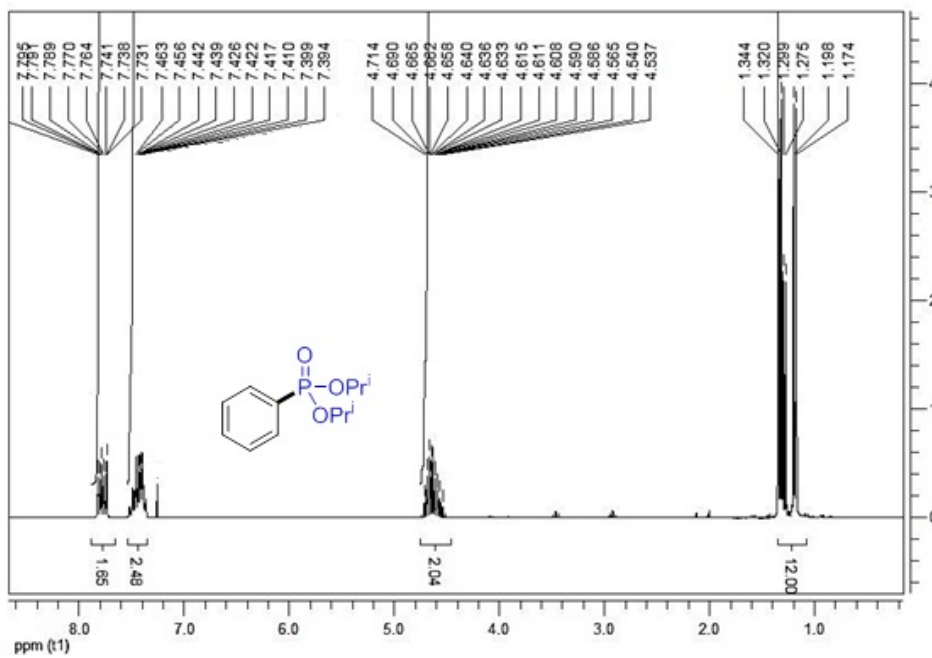

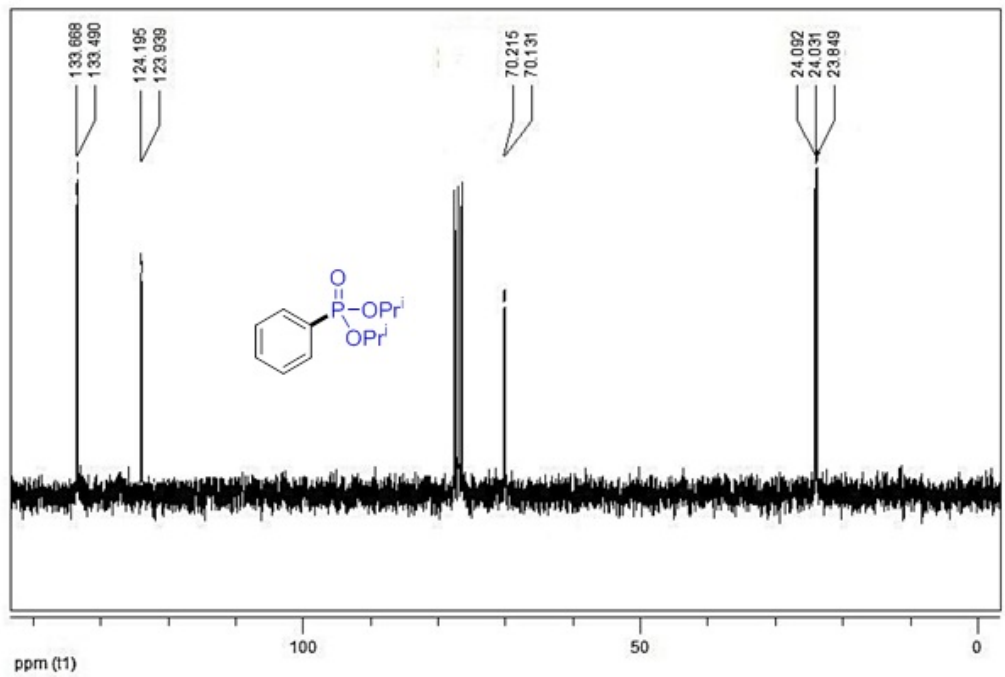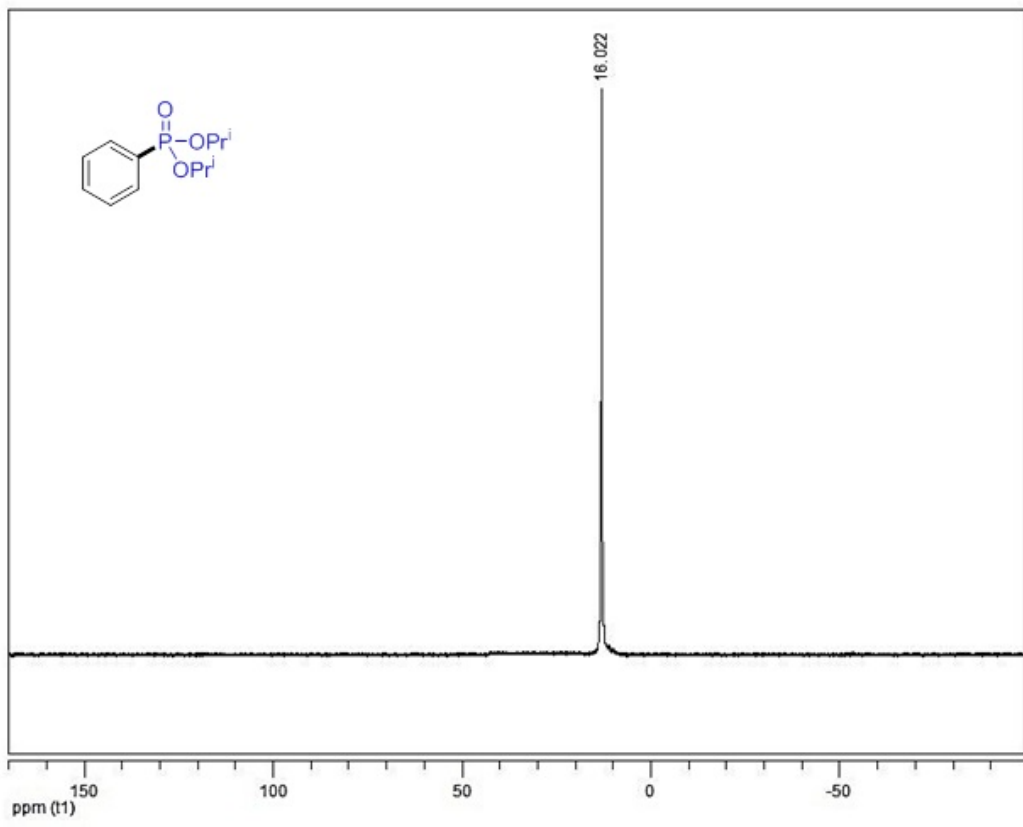

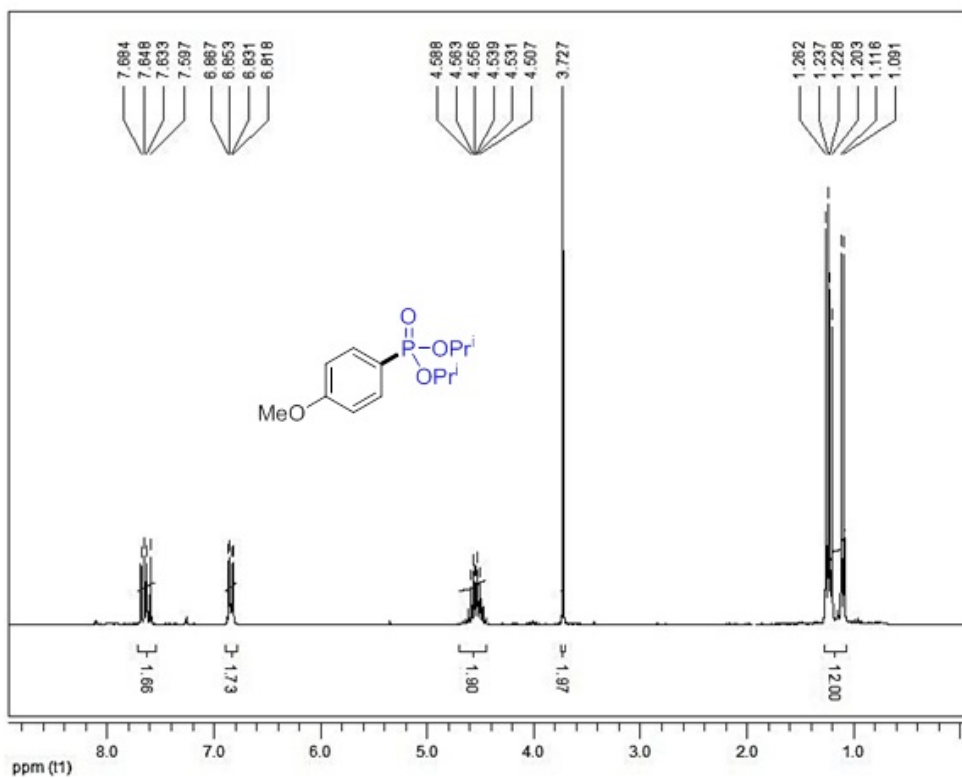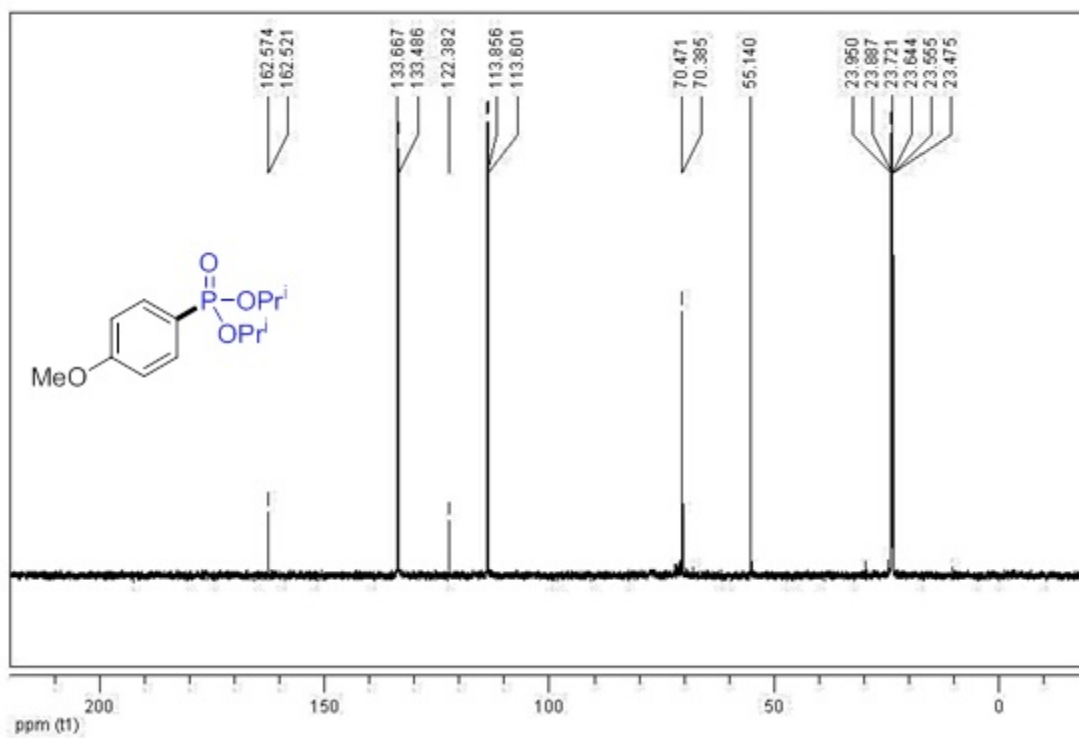



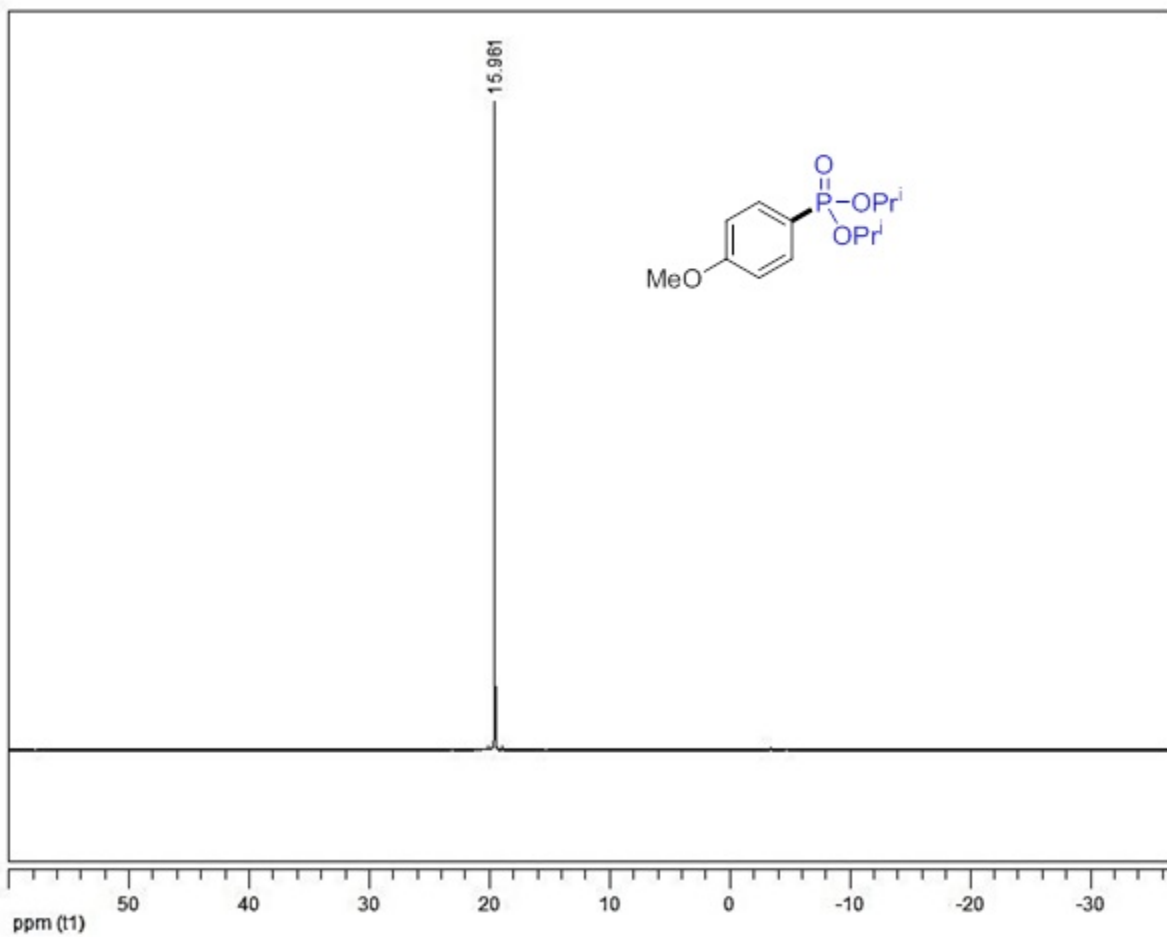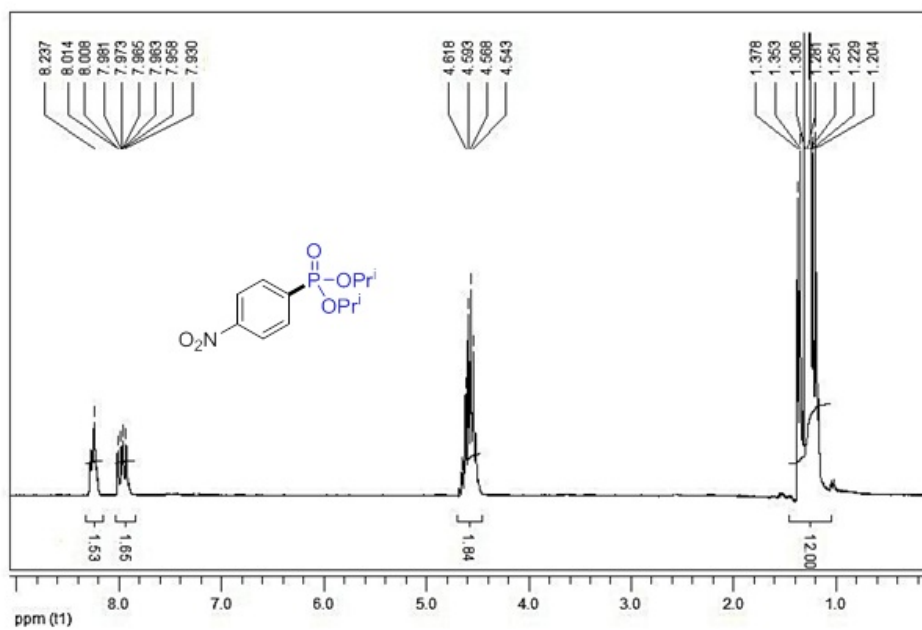

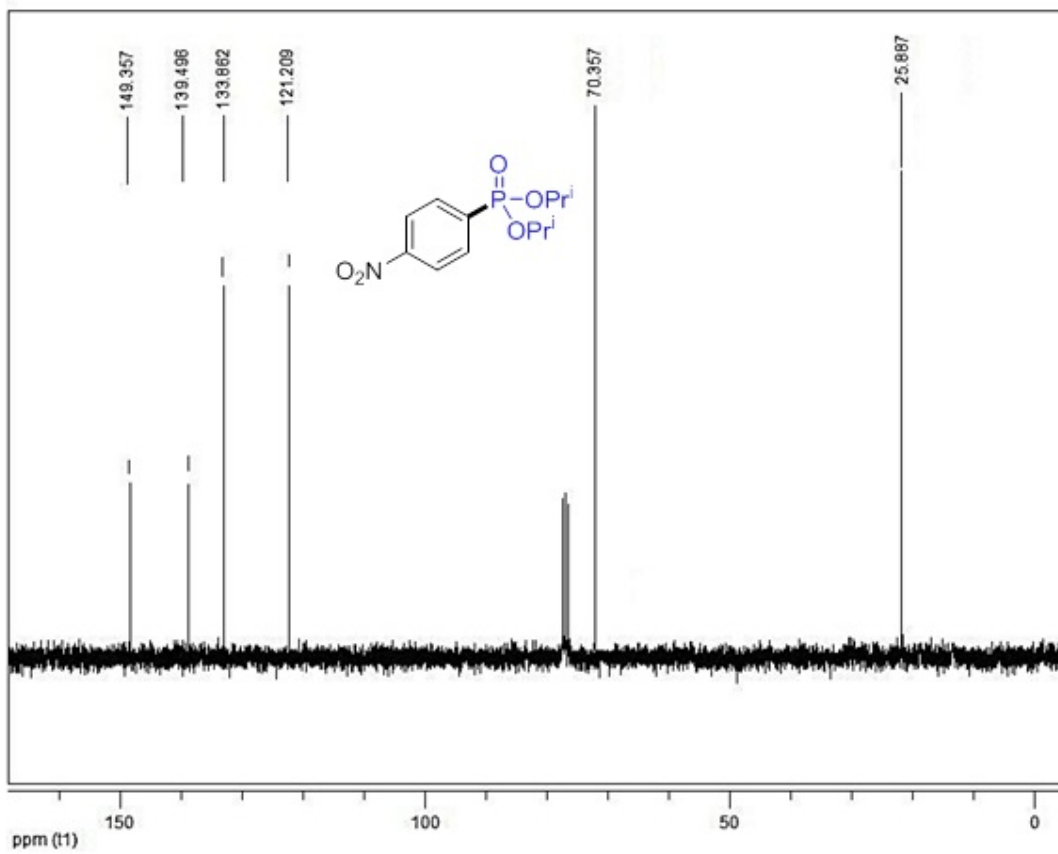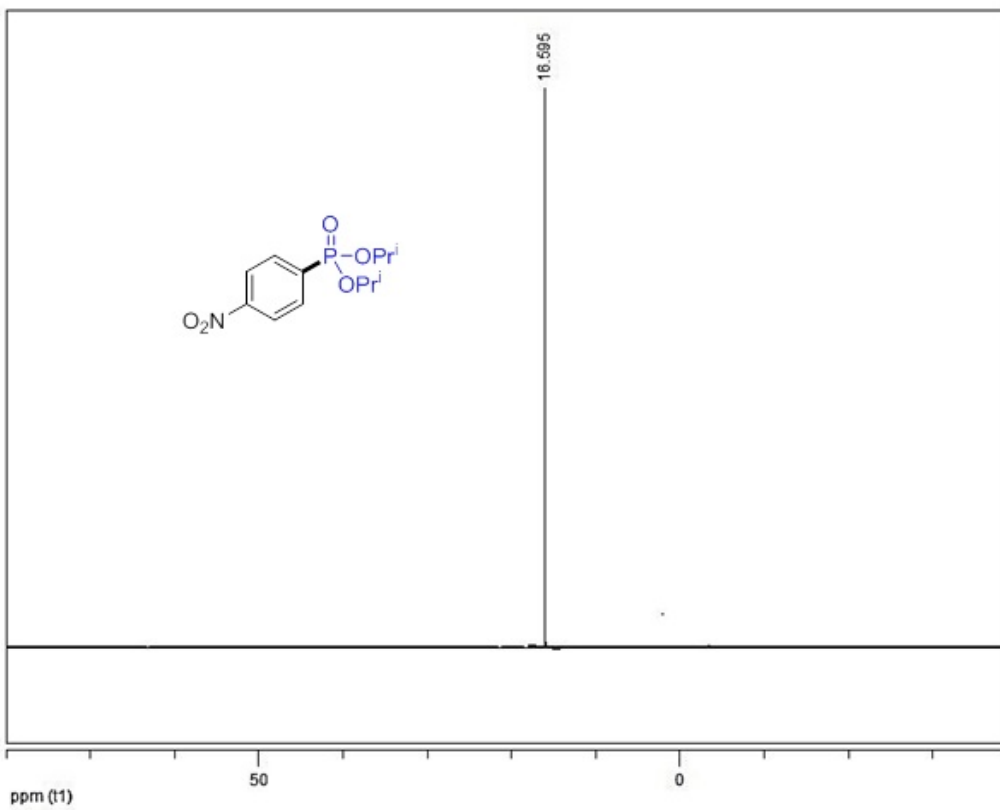

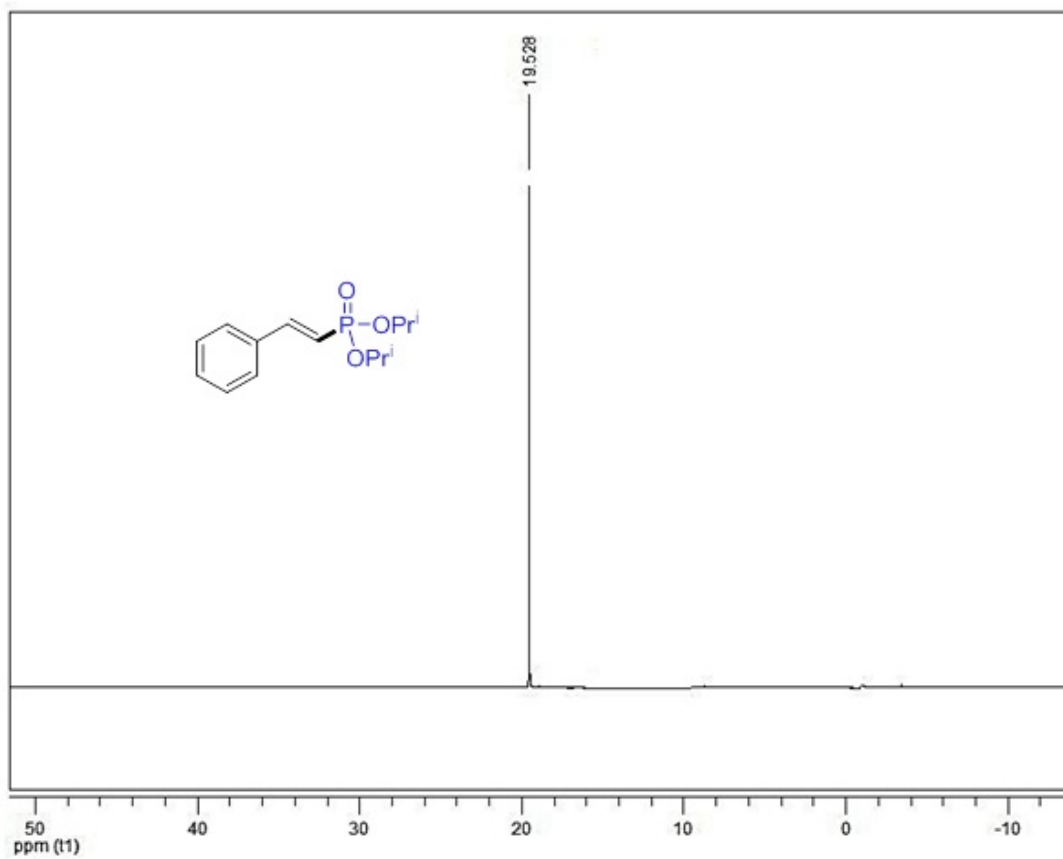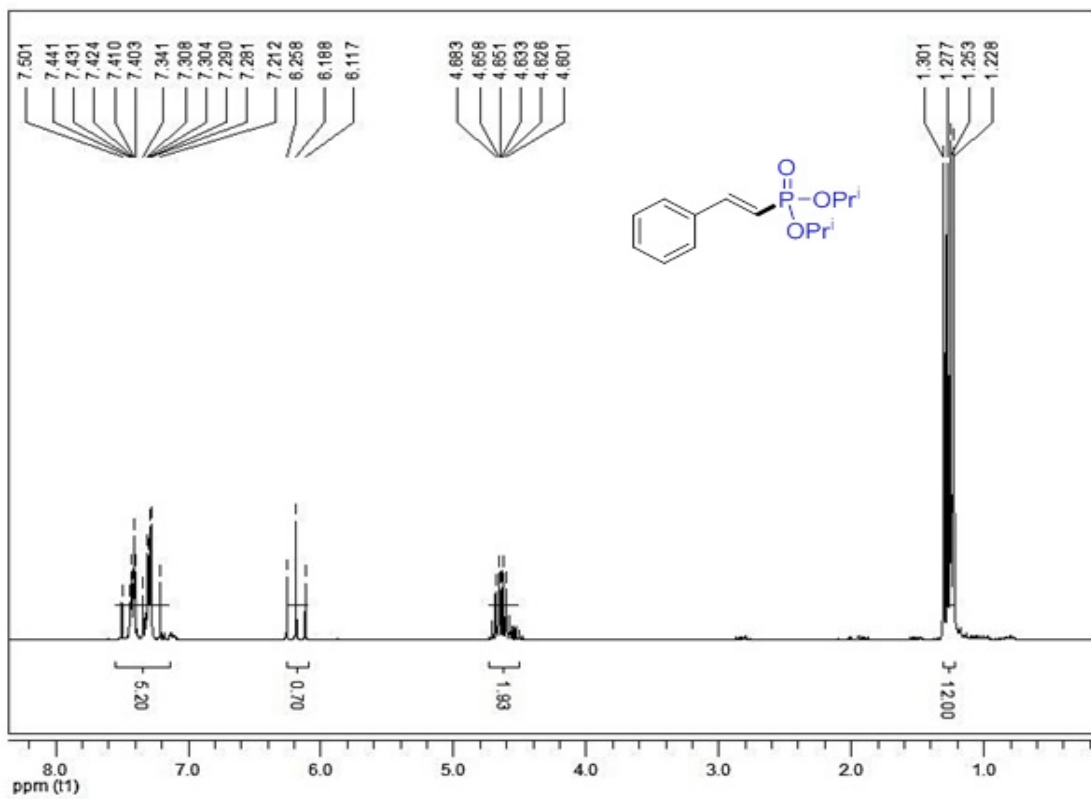

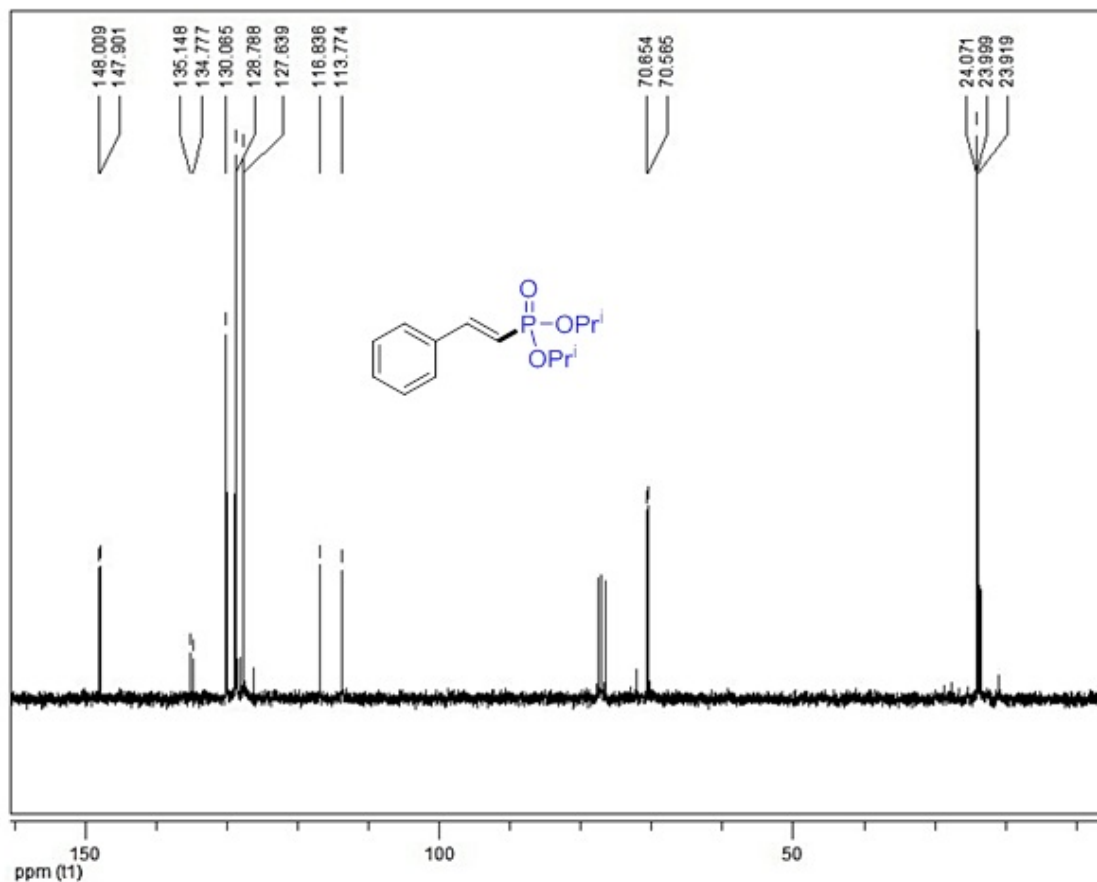

### 3 References:

1. T. Hirao, T. Masunaga, N. Yamada, Y. Ohshiro and T. Agawa, *Bull. Chem. Soc. Jpn.*, 1982, **55**, 909
2. Y. Luo and J. Wu, *Organometallics*, 2009, **28**, 6823
3. C. Huang, X. Tang, Y. Y. Jiang and Y. F. Zhao, *J. Org. Chem.*, 2006, **71**, 5020
4. H. Hu, Y. Wu, K. Xu and F. Yang, *Eur. J. Org. Chem.*, 2013, **2**, 319.
5. D. Villemen, A. Elbilali, F. Simeon, P. A. Jaffres, G. Maheut, M. Mosaddak and A. Hakiki, *J. Chem. Research (S)*, 2003, 436
6. R. Zhuang, J. Xu, Z. Cai, G. Tang, M. Fang, and Y. Zhao, *Org. Lett.*, 2011, **13**, 2110
